# **On the evolution of neural decisions from uncertain visual input to uncertain actions**

Running title: Visuomotor transformation and decision

Alessandro Tomassini<sup>1\*</sup>, Darren Price<sup>1</sup>, Jiaxiang Zhang<sup>2</sup>, James B Rowe<sup>1,3</sup>

1. Medical Research Council Cognition and Brain Sciences Unit, University of Cambridge, CB27EF, UK
2. Cardiff University Brain Research Imaging Centre, School of Psychology, University of Cardiff, CF2 2AT, UK
3. Department of Clinical Neurosciences, University of Cambridge, CB2 0SZ, UK

\* Corresponding author: [alessandro.tomassini@mrc-cbu.cam.ac.uk](mailto:alessandro.tomassini@mrc-cbu.cam.ac.uk)

## 1 **Abstract**

2 Everyday behaviors are governed by decisions, about what we see and which actions  
3 to take. Here we present a model of the evolution of decisions from visual perception  
4 to voluntary action, in humans. We combine accumulation-to-threshold modelling of  
5 visuomotor decisions under different levels of uncertainty, with electro-/magneto-  
6 encephalographic recording, to trace the sequence of localised decision processes,  
7 separately encoded in beta and gamma frequency ranges, and the flow of information  
8 through cortical networks. We show that evidence accumulation in motor and prefrontal  
9 cortex, to resolve action uncertainty, begins within 100ms from the onset of visual  
10 evidence accumulation, before the threshold in sensory regions is reached suggesting a  
11 continuous (rather than sequential) processing of information from perception to action.  
12 Moreover, the direction of flow of information between sensory, motor and association  
13 cortices, is opposite in beta and gamma frequency bands. The frequency, temporal and  
14 spatial distributions of the decision processes reveal widespread hierarchical  
15 information processing networks through which we resolve trial-by-trial action  
16 decisions despite environmental uncertainty.

## 17 **Introduction**

18 Human behaviors are the result of many decisions, from early or automatic perceptual  
19 inferences about our environment to complex goal-directed choices between alternate  
20 courses of action. Three broad lines of research have made separate contributions to  
21 understanding such decisions. First, the psychophysical analysis of visuomotor task  
22 performance and reaction times, in health <sup>1</sup> or in the presence of focal <sup>2</sup> and degenerative  
23 brain lesions <sup>3</sup>.

24 Second, the functional anatomical analysis of decision making using brain imaging and  
25 neurophysiology, including paradigms that manipulate visual uncertainty <sup>4</sup>, action  
26 selection <sup>5</sup>, or outcome evaluation <sup>6</sup>. Third, the development of computational models  
27 of how decisions can be reached, at the level of neuronal ensembles <sup>7</sup> or groups of  
28 individuals <sup>8</sup>.

29 It remains a challenge however, to bring these separate lines of enquiry together in a  
30 unified model of neurophysiologically informed decision process, embedded in a  
31 functional anatomical framework, that can together explain the transformation of noisy  
32 visual inputs to alternative motor outputs. The anatomical framework has an additional  
33 requirement, which is to accommodate the evidence for functional segregation between  
34 sensory and motor areas at the same time as allowing the flow of information through  
35 hierarchical and distributed brain networks.

36 Here we develop an integrated account of visuomotor decision-making, as summarised  
37 in **Figure 1**, working from a novel visuomotor task that adjusts sensory and action  
38 uncertainty during functional brain imaging by combined electro-  
39 /magnetoencephalography (MEEG).

40 A long tradition in mathematical psychology has argued that decisions and their  
41 latencies are controlled by when cumulative evidence in favour of a choice reaches a  
42 criterion decision threshold <sup>9</sup>. We identify the accumulation-to-threshold of latent  
43 variables representing sensory evidences, based on the transformation of visual signals  
44 into evidence about the behaviorally relevant stimulus features (perceptual  
45 decisions,<sup>10,11</sup> ); and the analogous ‘evidence’ for motor schema, which have been  
46 termed motor intentions (action decisions <sup>12,13</sup> ).

47 Previous studies of visuomotor tasks typically focus on either perceptual decisions (e.g.  
48 judgement of motion direction) or on action decisions (e.g. choice of a motor response),  
49 whereas in real-world scenarios agents are required to use the outcome of their  
50 perceptual deliberations to inform decisions between alternate responses. This  
51 distinction can be lost in experimental paradigms where perceptual decisions are rigidly  
52 mapped onto motor responses<sup>14,15</sup>, potentially conflating perceptual and action  
53 decisions or attributing variance to one or other process<sup>16</sup>.

54 Rather than arbitrarily divide visual from motor transformations, we investigated their  
55 associated decision processes by separately manipulating uncertainty in the identity of  
56 visual features (perceptual uncertainty, by variable motion coherence) and range of  
57 possible actions (action uncertainty, by variable number of response options). While  
58 many studies have used two-alternate forced choice paradigms with differential  
59 rewards, we adopted a n-way decision task to study decisions made between equivalent  
60 outcomes<sup>17</sup> (**Figure 2**).

61 Several brain regions have been identified that accumulate perceptual evidence<sup>10,11</sup> and  
62 motor intentions<sup>12,13</sup>. However, it is also necessary to understand how a network of  
63 accumulator regions orchestrates their activity for the critical transformation between  
64 perceptual and action decisions.

65 Specifically, we sought to distinguish (i) a serial process<sup>18</sup> where perceptual decisions  
66 are complete and their output passed to motor accumulators, from (ii) a continuous flow  
67 of information<sup>19</sup>, through perceptual to associative and motor regions before  
68 completion of perceptual analysis. A serial process would be robust to error, but  
69 continuous flow would enable faster action decisions. To differentiate these  
70 alternatives, we mapped the modelled temporal profile of evidence accumulation to  
71 neurophysiological signatures, trial-by-trial. The temporal evolution of predicted  
72 evidence was based on behaviorally optimized generative linear ballistic accumulator  
73 model of the decision (**Figure 3f**).

74 We exploited the temporal resolution of MEEG to measure spatiotemporal variance of  
75 the induced power<sup>20</sup>. We focused on the beta and gamma band power as the candidate  
76 correlates of the evidence for three reasons.

77 First, the growing evidence for separate functions of gamma and beta in the feedforward  
78 and feedback of information respectively in hierarchical brain networks<sup>21,22</sup>. Second,  
79 that the accumulation of evidence for perceptual choices correlates with gamma-  
80 frequency oscillations<sup>23</sup>. Third, that the processes underlying the deliberation between  
81 alternate actions have been associated with beta power modulation<sup>24-26</sup>.

82 The use of MEEG affords a source model of cortical generators<sup>27</sup> and enables the  
83 functional segregation of sensory and motor area, as well as areas where sensory-motor  
84 transformations occur. Complementary connectivity measures (phase transfer  
85 entropy<sup>28</sup>) reveal the flow of information between areas, orchestrating the emergence  
86 of decision-evidences across decision networks.

87 We show that evidence accumulation in motor and prefrontal cortex begins very soon  
88 after visual cortex, and before perceptual decisions are concluded. We further  
89 demonstrate that the timing of evidence accumulation and the direction of flow of  
90 information between widespread sensory, motor and association cortices differ between  
91 Beta (13-30Hz) and Gamma (31-90Hz) frequency range. An early sweep of Gamma  
92 activity across an occipito-parietal-frontal network precedes the gradual arising of Beta  
93 mediated decision signals.

94 These signals emerge progressively in a lateralized caudo-rostral cascade unfolding  
95 along the dorsal stream. The cascade is mainly driven by a lateralized and continuous  
96 flow of information from posterior visual areas to distant anterior action control  
97 regions. Crucially, the strength of the information flow (as measured by phase-transfer  
98 entropy) determines the speed of progression throughout all stages of information  
99 processing from perception through action as reflected by a positive relationship  
100 between connectivity and both faster model accumulation-rates and shorter reaction-  
101 times. This provides an important formal link between behaviour, established models  
102 of decision-making, and connectivity measures. Taken together, the results reveal a  
103 continuous flow of information transmitted and integrated through a hierarchical  
104 network that transforms decision-making from perception to action.

105

106

## 107 **Results**

### 108 *Behavior*

109 To functionally segregate computations mediating visual and action decisions, we used  
110 a novel decision-making task to separately manipulate uncertainty in the identity of  
111 visual features (perceptual uncertainty), and actions (action uncertainty). The task  
112 combined elements of the classic motion discrimination task<sup>29</sup> with a response selection  
113 task<sup>13</sup>. Noisy visual stimuli indicated the one or more response options, which were  
114 executed by pressing a corresponding button (**Figure 2** and **Methods**).

115 Uncertainty in perceptual and action decisions was manipulated by varying the noise in  
116 the option stimuli and manipulating the number of permitted responses in a full factorial  
117 design. The noise in the visual stimuli introduces perceptual uncertainty<sup>11,29</sup>. The  
118 variable number of permitted response options introduced action uncertainty<sup>13,30</sup>.

119 Previous work has shown that the uncertainty associated with both the stimulus motion  
120 and the number of available choices systematically influences the parameters of models  
121 of decision-evidence accumulation<sup>11,13,30</sup>. Therefore, by manipulating motion  
122 coherence in the random dots stimuli and the number of offered choices, we sought to  
123 isolate the neural signatures of decision-evidence accumulation for perceptual and  
124 action decisions, respectively.

125 Participants performed the task first in a training session where individual motion  
126 thresholds were estimated for both low and high action uncertainty levels (**Figure 3a**).  
127 Subsequently, participants performed the task with the motion thresholds that  
128 standardized performance, while undergoing MEEG scan.

129 During training, participants were slower and less accurate when motion coherence  
130 was lower (**Figure 3a**). Similarly, during the scan session (**Figure 3b** and  
131 **Supplementary Figure 1**) responses were slower under high perceptual (low = 0.77s  
132  $\pm 0.1$ ; high = 0.88s $\pm 0.1$ ;  $F(1,17) = 158.17$   $p < 0.0001$ ; post-hoc  $p < 0.0001$ ) and action  
133 uncertainty (low = 0.80s  $\pm 0.13$ ; high = 0.85s $\pm 0.1$ ;  $F(1,17) = 6.28$   $p = 0.022$ ; post-hoc  
134  $p = 0.022$ ; 2-by-2 repeated measures ANOVA; Tukey-Kramer correction). In summary,  
135 behavior scaled with levels of perceptual and action uncertainties, confirming the  
136 efficacy of our manipulations.

137 To verify that participants' choices were substantially independent over trials,  
138 Shannon's equitability index was calculated for sequential choice pairs<sup>13</sup>. The  
139 Shannon's equitability index for all participants had mean 0.77 (SD ± 0.016) and did  
140 not differ significantly from the index generated by random permutations of trial  
141 order (see **Supplementary Figure 2**) confirming that subjects' choices were not  
142 biased by previous responses.

143

#### 144 *Uncertainty modulates the rate of evidence accumulation*

145 Summary statistics of behavioral data cannot adequately explain the mechanism by  
146 which uncertainty slows decisions. We adopted formal models of decision-making to  
147 decompose the behavioral performance into cognitively relevant latent variables. We  
148 fitted accumulation-to-threshold models (Linear Ballistic Accumulator, LBA,<sup>31</sup> to each  
149 participant's reaction time and accuracy data.

150 The LBA model of decisions is more tractable than drift-diffusion models for n-way  
151 decisions while still remaining physiologically informative<sup>32</sup>. In the LBA each  
152 decision was represented by an accumulator that integrated decision-evidence up to a  
153 boundary. When the accumulated evidence crosses the boundary a decision is  
154 committed (**Figure 3c**). Instead of adopting a two-stage model, which assumes a  
155 discrete serial process between perceptual and action decisions, we opted for a 'unitary'  
156 model where both perceptual and action uncertainty concur in determining participant's  
157 performance in a given trial. The factorial design of the experiment enabled us to  
158 divorce perceptual and action decision processes using connectivity metrics (see  
159 below).

160 Uncertainty can slow responses by reducing the speed of information accumulation  
161 (accumulation-rate), increasing response caution (decision boundary), stretching the  
162 time required by perceptual and motor processes not directly related to the decision  
163 process (non-decision time), or by a combination thereof.

164 To differentiate these competing mechanisms, we fitted all possible combinations of  
165 free parameters in a set of 15 LBAs. We compared the goodness-of-fit of each model  
166 using random-effects Bayesian model comparison<sup>33,34</sup>. The model comparison

167 revealed that changes in the accumulation-rate alone (model number 2; **Figure 3d** top  
168 panel) accounted parsimoniously for the effects of uncertainty on behavior. The  
169 goodness-of-fit of the winning model was further confirmed by posterior predictive  
170 checks (**Figure 3d** bottom panel), performed by simulating data under the winning  
171 model and then comparing these to the observed data.

172 In the winning model (henceforth, the LBA model), high uncertainty is associated with  
173 comparatively slow accumulation rates. This relationship between uncertainty and  
174 accumulation rate held for both perception ( $z = 3.723$ ,  $p = 0.00019$ ; Wilcoxon sign rank  
175 test) and action ( $z = 3.723$ ,  $p = 0.00019$ ; Wilcoxon sign rank test) uncertainty, as well  
176 as for each subject (**Figure 3e**), in accord with previous studies<sup>11,30</sup>.

177 Non-decision time ( $t_0$ ), encompassing sensory delays and motor execution, was  
178 estimated to be 370ms on average (see **Supplementary table 1**), which is within the  
179 plausible range of non-decision times for humans<sup>35,36</sup>.

180

### 181 *Localization of decision-evidence accumulation*

182 To localize neural signatures of decision-evidence represented across the brain, we  
183 derived temporally resolved estimates of neuronal population activity from the winning  
184 model, which we fitted to a combined MEG and EEG signal, inverted to source space  
185 using the L2-Minimum Norm<sup>27</sup>.

186 We reduced the dimensionality of the MEEG data by parcellating the cortical surface  
187 into a set of 96 regions of interest (ROIs) defined using the Harvard-Oxford cortical  
188 atlas (FSL, FMRIB, Oxford) and by representing the dynamic of each ROI with a single  
189 time-course, obtained using principal component analysis<sup>37</sup>. Dimensionality reduction  
190 allows for improved computational efficiency. Further, it reduces multiple comparisons  
191 issues and increases statistical power, while retaining the maximum amount of  
192 information<sup>38</sup>.

193 The temporal evolution of the spectral power (power envelope) in each region served  
194 as the signal for our analysis in beta (13-30Hz) and gamma (31-90Hz) bands. The time  
195 onset of evidence accumulation across ROIs was identified by optimizing the split of



196 the non-decision time before and after the accumulation period using Spearman  
197 correlation to the MEEG power envelope (**Figure 3f**, see **Supplementary Figure 3**  
198 for the statistical map). This allows one to depict in space and time the emergence of  
199 decision-evidence accumulation.

200 Traditionally, evidence accumulation is associated with increased activity (e.g. firing  
201 rates) during decisions. However, recent studies indicate that both increasing and non-  
202 increasing activity can mediate evidence accumulation<sup>39-41</sup>. In agreement with this idea,  
203 we found significant (negative) correlations between the LBA model predictions and  
204 the MEEG oscillations in beta and gamma bands<sup>20</sup> (**Figure 4**). Specifically, for both  
205 beta and gamma, neural activity after coherence onset desynchronized in a graded  
206 fashion and peaked approximately before response suggesting a form of threshold  
207 mechanism (**Figure 4a**)<sup>42-44</sup>.

208 In the beta band, desynchronization was strongly modulated by uncertainty in good  
209 agreement with our predictions. As the decision unfolds, the accumulated decision-  
210 evidence will ramp quickly with low perceptual uncertainty, and slowly with high  
211 perceptual uncertainty. Accordingly, desynchronization of beta power-envelopes  
212 averaged across trials and ROIs was larger ( $p < 0.0001$ , cluster corrected random  
213 permutations) for low than high perceptual uncertainty<sup>22,42</sup>.

214 When a response is chosen between multiple options, the race underlying the selection  
215 of each alternative is characterized by an overall larger amount of decision-evidence  
216 summed across all the racing accumulators by the time of response<sup>13,30</sup>. Accordingly,  
217 desynchronization of beta power-envelopes averaged across trials and ROIs was larger  
218 for high than low action uncertainty ( $p < 0.0001$ , cluster corrected random  
219 permutations). Gamma power-envelopes, showed a similar trend, but the effects were  
220 statistically insignificant.

221 To locate activity related to decision-evidence accumulation, the time course of power-  
222 envelopes was correlated (Spearman) to time-varying model predictions in a trial-to-  
223 trial fashion. This allows one to take advantage of inter-trial variability. Statistical  
224 significance of the resulting z-transformed correlation values was assessed for each  
225 ROI by comparisons against a null distribution created from correlating the model  
226 predictions with single trial power-envelopes scrambled by phase ( $10^4$  permutations).

227 This analysis revealed a brain-wide network displaying decision-related dynamics  
228 expressed in the beta range (Fig3b, mean across significant ROIs: sign-test  $z = -3.15 \pm$   
229  $0.48$ ,  $p = 0.00065 \pm 0.0016$ , FDR corrected). These observations agree with previous  
230 human EEG work suggesting that evidence accumulation might correlate with  
231 widespread low-frequency desynchronization<sup>45</sup>.

232 In the gamma band we observed a more localized mosaic of ROIs including  
233 contralateral motion sensitive areas (inferior lateral occipital region), bilateral  
234 extrastriate areas and bilateral frontal motor regions (comprising premotor areas and  
235 supplementary motor area; mean across significant ROIs: sign-test  $z = -2.27 \pm 0.27$ ,  
236  $p = 0.0058 \pm 0.003$ , FDR corrected).

237 In addition, we compared the z-transformed correlation values for each of the four  
238 levels of our manipulations in isolation and confirmed that the quality of fit and the  
239 results did not vary across trials types ( $p > 0.05$ , FDR corrected).

240

241

#### 242 *A continuous flow of information*

243 We traced the spectrally resolved temporal evolution of decisions through the visuo-  
244 motor hierarchy, finding that decision-evidence accumulation emerges with distinct  
245 spatio-temporal profiles between beta and gamma (**Figure 4b**).

246 An early wave of accumulation begins at ~120ms from coherence onset within the  
247 sparse network oscillating at gamma frequency. It is followed by a second wave  
248 mediated by Beta at ~160ms from coherence onset (**Figure 4c**; Conjunction of  
249 significant ROIs in beta and gamma, median latency across participants,  $z = 5.53$ ,  
250  $p < 0.0001$ , Wilcoxon rank test). No difference in latencies was found between  
251 hemispheres across frequency bands.

252 The latency maps (**Figure 4b**) show an accumulation gradient towards the precentral  
253 gyrus. We fitted a piecewise regression model with a free internal knot to the mean  
254 latencies of ROIs located along the dorsal path (**Figure 4d**), a critical system for  
255 visuomotor decisions<sup>26,46</sup>.

256 In keeping with our observations the model (**Figure 4e** left top-bottom panels)  
257 identified the precentral gyrus (comprising primary motor cortex and part of the  
258 premotor cortex) as the point of convergence of two linear functions ( $R^2 = 0.734$ ,  $p <$   
259  $0.0001$ ) and outperformed a single regression model (piecewise  $R^2_{\text{adj}} = 0.681$ ; linear  
260  $R^2_{\text{adj}} = 0.649$ ; adjusted  $R^2$  penalizes extra free parameters in favor of simple models).

261 Interestingly, in the gamma band (**Figure 4d** bottom left panel) we found a mirror-  
262 symmetric trend with increasing accumulation latencies while proceeding from the  
263 precentral gyrus to more posterior and anterior regions ( $R^2 = 0.245$ ,  $p = 0.042$ ). Thus,  
264 accumulation starts with gamma at  $\sim 120$ ms from coherence onset in the precentral  
265 gyrus and at  $\sim 160$ ms in the occipital and frontal poles.

266 The onset of the accumulation in beta overlaps with gamma in the occipital pole at  
267  $\sim 160$ ms from coherence onset<sup>47</sup>. The interval from earliest onset of accumulation to  
268 last onset, is only  $\sim 100$ ms and the onset in precentral gyrus is on average  $\sim 570$ ms  
269 before a motor response<sup>44</sup>. The delay from motion onset to the beginning of the  
270 accumulation on the occipital pole ( $\sim 160$ ms), and the delay from action decision to  
271 movement initiation in precentral gyrus ( $\sim 100$ ms) are close to the sensory ( $\sim 200$ ms)  
272 and motor ( $\sim 80$ ms) delays measured from neural recordings on macaque<sup>11,48</sup>.

273 These patterns, albeit with lower spatial resolution, were also found at the sensor level  
274 (**Supplementary Figure 4**). As a note of caution for the piecewise regression, the fit  
275 of the LBA model for some of the ROIs within the dorsal path was not significant in  
276 the gamma band, reducing the accuracy of their latency estimates.

277 An important observation is that the latest ROIs in the gradient for both beta and gamma  
278 starts accumulating decision-evidence before the earliest ROI (e.g. the occipital lobe  
279 for beta) has reached its decision boundary (**Figure 4e** right top-bottom panels). This  
280 suggests that decisions are made on the basis of a continuous flow of information, rather  
281 than a serial sequence of discrete decisions.

282

283

284

285 *From perception to action*

286 The above analyses identified a flow of information across a widespread visuomotor  
287 network. To functionally segregate accumulators sub-serving perceptual and action  
288 decisions, and to reveal the influx and efflux of information across them we measured  
289 the phase-transfer entropy, a data-driven measure of information flow that is robust to  
290 signal leakage<sup>28</sup>.

291 The analyses focused on regions whose activity significantly fitted the LBA model's  
292 prediction. We first identified ROIs that preferentially accumulated evidence for  
293 perception or action decisions. We reasoned that in a continuous flow of information,  
294 the amount of information transferred between perceptual and action accumulators is  
295 expected to co-vary with the rate of the accumulating process. Since the estimated  
296 accumulation-rates scale with uncertainty, the amount of information sent by a given  
297 region should also scale with uncertainty. This relationship enables one to identify  
298 regions where the amount of information varies systematically with the levels of either  
299 perceptual or action uncertainty.

300 **Figure 5a** shows, for the beta band, the regions modulated by action uncertainty  
301 (Action decision regions,  $p_{\text{corrected}} < 0.0005$  in all ROIs) and perceptual uncertainty  
302 (Perceptual decision regions,  $p_{\text{corrected}} < 0.0005$  in all ROIs). Action decision regions  
303 include ipsilateral cingulate and paracingulate cortex<sup>49</sup>, contralateral frontopolar  
304 cortex, ventromedial cortex, insula, supplementary motor cortex, inferior parietal  
305 lobule and medial parietal cortex<sup>13,50</sup>. Of notice, bilateral precentral gyri were identified  
306 as action decision regions which replicates previous findings<sup>13,51</sup>.

307 Perceptual decision regions in the contralateral hemisphere include posterior areas  
308 typically associated with decisions about motion direction. These include lateral  
309 occipital cortex (including motion area MT-complex), superior temporal cortex  
310 (comprising the superior temporal sulcus) and the superior parietal lobule comprising  
311 the superior intraparietal sulcus<sup>52</sup> along with the dorsomedial frontal cortex<sup>4,53</sup>.  
312 Interestingly, two areas along the dorsal path on the left hemisphere were sensitive to  
313 both perceptual and action uncertainty manipulations (superior frontal gyrus, middle  
314 frontal gyrus, lateral occipital cortex superior division (comprising V2 and V3;  
315  $p_{\text{corrected}} < 0.0005$  in all ROIs).

316 In the gamma band, we observed bilateral involvement of the superior frontal gyrus<sup>54</sup>  
317 and inferior frontal gyrus pars triangularis<sup>5</sup>, along with contralateral frontal medial  
318 cortex (Rowe et al, 2010) and ipsilateral paracingulate gyrus in action decisions  
319 ( $p_{\text{corrected}} < 0.005$  in all ROIs). Perceptual decision areas ( $p_{\text{corrected}} < 0.0005$  in all ROIs)  
320 included bilateral superior temporal areas (comprising the superior temporal sulcus;  
321 Pesaran and Freedman, 2016), cuneal cortex, and subcallosal cortex which has been  
322 linked to early encoding of confidence for perceptual decisions<sup>55</sup>.

323 The dominant direction of information transfer between ROIs was estimated using the  
324 directed phase-transfer entropy (Hillebrand et al, 2016). The average direction of  
325 information flow for each ROI was computed resulting in a single estimate of preferred  
326 direction of information flow (either inflow or outflow). Based on these estimates, we  
327 calculated a posterior-anterior index (Hillebrand et al., 2016; PAX) to quantify the  
328 direction of flow between caudal and rostral ROIs.

329 **Figure 5b** show the smooth global pattern of preferential information flow in the beta  
330 range with caudal ROIs preferentially sending information to anterior regions. This  
331 pattern is similar to that reported by Hillebrand et al. 2016 in human resting state, except  
332 that our results show a task-related lateralization, with the contralateral PAX almost  
333 twice the size of the ipsilateral one (left:  $p = 0.0002$ , PAX = 0.47; right:  
334  $p = 0.0051$ ; PAX = 0.27).

335 It can be seen from **Figure 5b-c** that, for beta, the strongest information flow was from  
336 the left lateral occipital cortex to the left middle frontal gyrus and the frontopolar cortex.  
337 This accords with previous reports of beta-synchronization between primate MT and  
338 frontal regions during motion discrimination<sup>56</sup>. No significant effect was seen for the  
339 gamma range in either hemisphere which might reflect the shorter range of gamma  
340 interactions<sup>57</sup>.

341

342

343

344

345 *Integration of behavioral, computational and physiological evidence*

346 To highlight the behavioral relevance of the integrated account of visuomotor decision-  
347 making, we explored the relationships between connectivity, accumulator model  
348 parameters and behavior. To account for multiple-comparisons, we used Holm-  
349 Bonferroni correction over eight tests.

350 In the beta range, the caudo-rostral gradient of evidence-accumulation is matched by a  
351 gradual transition from perception to action decisions, as shown by a positive  
352 correlation between regional specificity to the type of uncertainty and the estimated  
353 accumulation latencies (**Figure 6a** top left panel,  $r = 0.27$ ,  $p_{\text{corrected}} = 0.044$ ). Moreover,  
354 the information flow is aligned with the caudo-rostral gradient of accumulation since  
355 the flow proceeds from perceptual-decision regions to action-decision regions (**Figure**  
356 **6a** bottom left panel, correlation between regional specificity and direction of  
357 information flow:  $r = -0.37$ ,  $p_{\text{corrected}} = 0.0016$ ).

358 In contrast, for the gamma band we found there was neither significant relationship  
359 between region specificity and accumulation latency (**Figure 6a** top right panel,  
360  $r = 0.19$ ,  $p_{\text{corrected}} = 0.759$ ) nor significant evidence of flow of information from  
361 perception to action decision regions (**Figure 6a** bottom right panel,  $r = -0.37$ ,  $p_{\text{corrected}}$   
362  $= 0.068$ ).

363 Finally, we hypothesized that in a continuous flow of information the amount of  
364 information transferred between perceptual and action accumulators co-varies with the  
365 rate of accumulation. Faster progression from perception through action should be  
366 correlated with phase transfer entropy and model accumulation rate, but negatively with  
367 reaction-times.

368 This was the case in the beta range where strong flow was associated with short reaction  
369 times (**Figure 6b** top left panel, repeated-measures correlation:  $r_{\text{rm}} = -0.378$ ,  
370  $p_{\text{corrected}} = 0.03$ , CI [-0.588, -0.12]) and accumulation rates (**Figure 6b** bottom left  
371 panel,  $r_{\text{rm}} = 0.356$ ,  $p_{\text{corrected}} = 0.045$ , CI [0.096, 0.572]). No significant correlation was  
372 observed in gamma (**Figure 6b** top-bottom right, reaction times vs information flow:  
373  $r_{\text{rm}} = -0.079$   $p_{\text{corrected}} = 0.564$ ; accumulation-rate vs information flow:  $r_{\text{rm}} = 0.113$ ,  
374  $p_{\text{corrected}} = 0.816$ ).

375

## 376 **Conclusions**

377 There are two principal results from this study that illuminate the interaction between  
378 neural systems for perception and action. The first is that decisions in regions sensitive  
379 to motor precision do not wait until sensory decisions are completed. Instead, the  
380 accumulation of evidence in motor decisions begin within 100ms soon after the  
381 initiation of evidence accumulation in the first sensory regions. This indicates a  
382 continuous flow or cascade of information and its gradual transformation from sensory  
383 evidence to motor ‘intention’<sup>58</sup>.

384 The second is that the correlates of evidence-accumulation in the beta and gamma  
385 frequency ranges have distinct spatiotemporal profiles, and opposite dominant  
386 directions of flow. This spectral directionality is predicted by hierarchical cortical  
387 networks for prediction and inference in visuomotor control <sup>22,59–61</sup>. In the beta band,  
388 there is not only a spatial gradient in the timing of accumulation-to-threshold between  
389 occipital and pre-central cortex, but also a qualitative change in the accumulated  
390 signals: from sensitivity to visual uncertainty to sensitivity to response uncertainty.  
391 Moreover, the more sensitive a region is to action uncertainty (*vs.* perceptual  
392 uncertainty), the later its onset of beta accumulation, and the greater its bias to inflow  
393 (*vs.* outflow) as measured by phase transfer entropy (**Figure 6**). These effects were not  
394 confined to classical visual and motor regions, or even to the ‘dorsal stream’, but were  
395 identified throughout much of the cortex.

396 We set out to integrate the analysis of information flow, with decision-making  
397 implemented by the accumulation of evidence, and their joint influence on trial-to-trial  
398 variation in behavior (see **Figure 1**). Independent manipulation of perceptual and  
399 action uncertainty was coupled with the decomposition of performance into latent  
400 variables in a parsimonious linear ballistic accumulator model <sup>31</sup>, which accurately  
401 generated the response distributions in each task condition including the expected  
402 effects of task variance on response latencies <sup>11,30</sup>. The model predictions of within-trial  
403 accumulation were correlated with change in beta and gamma power after the onset of  
404 stimulus coherence. Beta desynchronization has been shown to scale with uncertainty  
405 <sup>51</sup>, but here we show its interaction with the temporal evolution of decision making over

406 sub-second intervals. The observed desynchronization displays two signatures of the  
407 accumulation-to-threshold class of models: accumulation of decision-evidence over  
408 time and the consistent bound reached shortly before each movement<sup>10,42–44</sup>.

409 Beta and gamma desynchronization have previously been correlated with behavioural  
410 performance. For example, in direct recording from non-human primates during  
411 working memory<sup>62</sup> and sensory discrimination<sup>25</sup>, the beta band desynchronization was  
412 greater for accurate trials compared with inaccurate trials. Such beta power encoding  
413 of decision outcomes is supramodal in many cortical areas<sup>63</sup>. The change in beta power  
414 followed the change in gamma power as in the current study: we found an early wave  
415 of gamma followed by a second wave of beta.

416 Although gamma and beta rhythms have been observed to occur together or in close  
417 succession<sup>64,65</sup>, the temporal relationship is functionally relevant. For hierarchical  
418 cortical networks, message passing between regions is a function of the laminar  
419 asymmetry of afferent vs. efferent connections<sup>59</sup>, and the properties of columnar  
420 circuitry which preferentially generates gamma rhythms superficially, and lower  
421 frequencies from deep layers<sup>66,67</sup>. This promotes predictive feedback connectivity in  
422 beta and lower frequencies, and preferential feedforward ‘error’ signalling in  
423 gamma<sup>22,61</sup>. The beta band’s lower frequency makes it inherently more suitable for  
424 coordination of information processing over longer conduction delays than gamma<sup>46</sup>.

425 As seen in **Figure 4**, where changes in spectral power were predicted by the LBA  
426 model, the latency to accumulation was confirmed as shorter for gamma than beta.  
427 Indeed, the spatial distribution of beta latencies in the dominant hemisphere (**Figure**  
428 **4e**) also shows a gradient from occipital, to parietal and prefrontal, and lastly motor  
429 cortex. The motor cortex is also a region of strong net influx of beta (**Figure 5b**), even  
430 more than premotor cortex, consistent with the active inference model of motor  
431 control<sup>22,61</sup>.

432 The spatial gradient of gamma latencies is reversed, with earliest changes observed in  
433 precentral cortex, before occipital cortex, and later gamma latencies in time with beta  
434 responses in occipital cortex. This may be because of the difference between predicting  
435 when a response may be required and what that response should be<sup>68</sup>. The sensory  
436 stimulus change (visual coherence) in our task is not the result of the participant’s own



437 response, but is predictable a second after the onset of the non-coherent display. The  
438 participant can predict when an action is required, but not which actions are permitted  
439 or specified. An increase in localized and predominantly short-range interactions in  
440 gamma range may therefore be a permissive of information required for the beta-  
441 mediated decision between action alternatives<sup>69</sup>.

442 Despite the similarity of onset of beta and gamma accumulation in occipital cortex, the  
443 connectivity analyses indicated distinct channels routing information at longer and  
444 shorter spatial scales, respectively. The pattern of net efflux vs. influx of beta (**Figure**  
445 **5b**) shows a clear division between frontal cortex and posterior lobes. In other words,  
446 there was a cascade of overlapping accumulators and information flow along a rostro-  
447 caudal axis from perceptual to motor regions for beta, at least in the hemisphere  
448 contralateral to the response hand.

449 Lateralized beta activity during a decision-making task reflects not just movement  
450 preparation, but has also been related to a dynamic decision process with updating of a  
451 motor plan as a decision evolves<sup>42-44,51</sup>. The beta power lateralization in motor areas  
452 was correlated with the state of decision-evidence. Crucially, these earlier MEG and  
453 EEG studies used a fixed-mapping between decisions outcomes and categorical  
454 behavioural responses, without choice or independence of perception and action  
455 decisions. When this fixed mapping between perceptual decisions outcome and motor  
456 responses is removed, sensorimotor beta lateralization disappears<sup>15</sup>. Our findings  
457 complement this work by directly revealing a lateralized progression of evidence  
458 accumulation from posterior perceptual regions to anterior motor areas.

459 Moreover, previous pioneering work on visuomotor decisions have focused on  
460 processes occurring at the final choice stage, leaving unresolved the question of  
461 whether evidence accumulation is coordinated throughout the whole cortex or just in  
462 specific regions. Our findings rest on a generalized model in which accumulation-to-  
463 threshold provides a canonical mechanism evolving throughout all layers of a  
464 visuomotor transformation (**Figure 3a**) and suggest that evidence accumulation is not  
465 a limited (perceptual) process with a single cortical focus, but distributed<sup>70,71</sup> and  
466 applicable to non-sensory evidence or intentions. This multi-focal property of evidence  
467 accumulation resonates with results from animal optogenetic<sup>70</sup> and pharmacological<sup>71</sup>

468 studies showing that inactivation of local cortical areas carrying decision-related  
469 activity did not affect decision-making performance.

470 Taken together, our observations support the hypothesis that the beta band response  
471 links sensory evidence to motor plans, throughout a widespread network<sup>72</sup>. We  
472 propose that an early neural signalling regarding the need for a response is followed  
473 by a second phase that integrates a continuous flow of information to make a decision  
474 between them<sup>73</sup>. In this second phase, decisions unfold on the basis of a continuous  
475 flow of information (**Figure 4d**), rather than sequential completion of intermediate  
476 decisions at the population level. However, this hypothesis refers to the population  
477 level, and we cannot exclude the possibility that within each region, a subsection of  
478 neurons completes the relevant decision and forwards this outcome to the next level in  
479 the hierarchy, while others in that region continue to accumulate.

480 The fluctuations in the strength of information flow caused by changes in uncertainty  
481 are behaviourally relevant, in their positive correlation with accumulation-rate and  
482 negative correlation with reaction times. This establishes an important formal link  
483 between behaviour, models of decision-making, and physiological connectivity. Fast  
484 accumulating-rates of the linear ballistic accumulator model are associated with a  
485 more effective information flow throughout the visuo-motor processing hierarchy,  
486 resulting in faster decisions and responses. This relationship could be exploited to  
487 investigate clinical conditions in which the ability to use sensory inputs to guide  
488 actions is impaired.

489 In summary, our analytical approach explains visuomotor decisions through the  
490 combination of computational modelling of behaviour to derive latent decision  
491 variables that are identified by their neurophysiological signatures in distributed  
492 cortical networks. Variations of beta and gamma power reflect the temporal and  
493 spatial dynamics of the accumulation and transfer of decision-evidence, with a  
494 continuous flow of information between regions rather than sequential discrete  
495 decisions. During this flow, there is a gradual transition from the resolution of sensory  
496 uncertainty to resolution of response uncertainty enabling goal-directed actions in the  
497 face of sensory uncertainty.

498 **Methods:**

499 **Participants**

500 Twenty healthy volunteers (9 females, 11 males, age range 18-39 years) took part in  
501 this study, after providing informed consent. Inclusion criteria included age 18-40  
502 years, right-handed, and screening for neurological or psychiatric illness. Two subjects  
503 failed to reach the requisite performance criterion during training and were excluded,  
504 leaving 18 subjects in all subsequent behavioral and neural analyses. Experimental  
505 protocols conformed to the guidelines of the Declarations of Helsinki and were  
506 approved by the local research ethics committee.

507

508 **Stimuli**

509 Stimuli were presented using Matlab and the Psychtoolbox routines in a sound-proof  
510 and dimly lit room. For the psychophysical training stimuli were displayed on a CRT  
511 monitor at 60cm, and for the scan session stimuli were projected on a screen through a  
512 projector at 130cm (both with a 60Hz refresh rate) with equivalent pixel resolution of  
513 0.03°.

514 Stimuli were four random dot kinematograms<sup>29</sup> displayed within four circular apertures  
515 (4° diameter) positioned along a notional semi-circular arc (3.4° eccentricity) on a black  
516 background (100% contrast). 200 dots were displayed during each frame and spatially  
517 displaced in the next frame to introduce apparent downward motion (6°/sec velocity).  
518 To manipulate motion strength (i.e. motion coherence) between trials, on each frame  
519 only a certain proportion of dots moved downward whilst the rest of the dots were  
520 randomly reallocated. Motion coherence level was kept constant throughout the trial.

521 Since abrupt stimulus onset and offset could elicit large sensory-evoked potentials  
522 which might mask decision processes, the 1.5 seconds long coherent motion interval  
523 was preceded and followed by intervals of zero-coherence levels lasting 1sec and  
524 0.5sec, respectively.

525

## 526 **Task and procedures**

527 Participants performed a finger-tapping task adapted from previous studies<sup>13,30</sup>. Their  
528 goal was to detect the onset of coherent motion and to press the button corresponding  
529 to one of the downward moving stimuli (coherent stimuli). The number of coherent  
530 stimuli defined two trial types: Low action uncertainty trials, where a single coherent  
531 stimulus commanded which button to press; and high action uncertainty trials, where  
532 three coherent stimuli required the participants to make a simple choice and press any  
533 one of the three corresponding buttons (a “fresh choice, regardless of what you have  
534 done in previous trials”<sup>30</sup>). Equal emphasis was placed on the speed and accuracy of  
535 the responses. Participants were instructed to fixate on a central red mark throughout  
536 the trial. Eye-tracking data collected during the first six scanning sessions confirmed  
537 participants were able to successfully perform the task while maintaining fixation (see  
538 **supplementary results**). Each trial started with the presentation of the fixation mark  
539 and stimuli onset ensued after a variable interval comprised between 0.5sec and 1sec.  
540 The imaging session was preceded by one training psychophysical session and one test  
541 session scheduled on separate days; the scanning session was conducted a maximum of  
542 four days after the psychophysical training, depending on the availability of the  
543 participants.

544

545 *Psychometric calibration*

546 Participants were firstly familiarized with the finger-tapping task during a short practice  
547 session where 100% coherent stimuli were adopted. The familiarization phase was  
548 completed when participants reached 90% accuracy across all trial types. In the  
549 following psychophysical training, motion coherence was randomly varied between  
550 trials to estimate individual motion thresholds. Eight logarithmically spaced motion  
551 coherence levels (0 0.5 0.10...0.9) were used (32 trials per level) following extensive  
552 piloting to ensure coverage of a wide range of individual motion sensitivity. Each  
553 training session comprised 16 blocks of 32 trials. Feedback was provided for  
554 correctness of responses as well as for too early or too late responses (100ms and 2.5s  
555 from motion coherence onset, respectively).

556 To ensure that participants perceived all the available options (i.e. coherent stimuli)  
557 before committing to a decision, occasionally ( $p = 0.2$ ) after a correct choice they had  
558 to perform a secondary match-to-sample task: a set of grey discs replaced the stimuli  
559 and participants had to report whether their locations matched the location of the  
560 previously displayed coherent stimuli. They had to press any button to report a match  
561 and withhold any response otherwise. A trial was considered as correct only when both  
562 choice and matching were correct. Trials with un-matching responses were discarded  
563 and repeated within the session.

564 To tailor the sensory evidence to the participants' individual motion sensitivity across  
565 number of options, the discrimination accuracy of each trial type in each training  
566 session was fitted using a maximum likelihood method, with a Log-Quick function  
567 defined as

568  $F_{log} = 1 - 2^{-10^{\beta(x-\alpha)}},$  (1)

569 where  $\alpha$  is the threshold,  $\beta$  is the slope and  $x$  is the coherence level. To obtain the  
570 proportion correct for each trial type, the Log-Quick function was scaled by,

571  $P = \gamma + (1 - \gamma - \lambda)F_{log},$  (2)

572 where  $\gamma$  is the guess rate and  $\lambda$  is the lapse rate controlling the lower and upper  
573 asymptote of the psychometric function, respectively.

574 Individual low and high perceptual uncertainty levels for each trial type were estimated  
575 as the 75<sup>th</sup> and 90<sup>th</sup> percentile of the psychometric functions from the last session. The  
576 reason for adopting these thresholds was twofold: firstly, participants need to perceive  
577 all the available options before committing to a decision. Secondly, supra-threshold  
578 trials are best suited for investigating neural correlates of evidence accumulation<sup>74</sup>.

579

#### 580 *Test and scan sessions*

581 Test and scan sessions were scheduled on separate days; the scanning session was  
582 conducted a maximum of four days after the psychophysical training, depending on the  
583 availability of the participants. The test session was to ensure that the participants were  
584 able to perform well under the individually adjusted motion thresholds. In the test and  
585 scan sessions, coherence levels were fixed to the individual thresholds corresponding  
586 to high and low levels of perceptual uncertainty, the match-to-sample task was  
587 removed, and no feedback was provided except for too late or too long responses.  
588 Levels of perceptual and action uncertainty were randomly interspersed across trials.  
589 Each session consisted of 10 blocks (total 720 trials per participant) separated by a short

590 rest. Trials on which responses were made before 0.1-sec or after 2-sec (on average  
591 1.3% of total trials) were excluded from subsequent analyses.

592

### 593 **MEG and EEG data acquisition and processing**

594 An Elekta Neuromag Vectorview System simultaneously acquired magnetic fields  
595 from 102 magnetometers and 204 paired planar gradiometers, and electrical potential  
596 from 70 Ag-AgCl scalp electrodes in an Easycap extended 10-10% system. Additional  
597 electrodes provided a nasal reference, a forehead ground, paired horizontal and vertical  
598 electro-oculography (EOG), electrocardiography (ECG) and neck electromyography  
599 (EMG). All data were recorded and digitized continuously at a sample rate of 1kHz and  
600 high-pass filtered above 0.01 Hz.

601 Before scanning, head shape, the locations of five evenly distributed head position  
602 indicator coils, EEG electrodes location, and the position of three anatomical fiducial  
603 points (nasion and left and right pre-auricular) were recorded using a 3D digitizer  
604 (Fastrak Polhemus Inc., Colchester, VA). The initial impedance of all EEG electrodes  
605 was optimized to below 10 k $\Omega$ , and if this could not be achieved in a particular channel,  
606 or if it appeared noisy to visual inspection, it was excluded from further analysis. The  
607 3D position of the head position indicators relative to the MEG sensors was monitored  
608 throughout the scan. These data were used by Neuromag Maxfilter 2.2 software, to  
609 perform environmental noise suppression, motion compensation, and Signal Source  
610 Separation.

611 Subsequent analyses were performed using in-house Matlab (Mathworks) code,  
612 SPM12 (<http://www.fil.ion.ucl.ac.uk/spm>) and EEGLab (Swartz Center for

613 Computational Neuroscience, University of California San Diego). Separate  
614 independent component analysis was computed for the three sensor types and  
615 artifactual components were rejected. For EEG data, components temporally and  
616 spatially correlated to eye movements, blinks and cardiac activity were automatically  
617 identified with EEGLab's toolbox ADJUST. For MEG data, components were  
618 automatically identified that were both significantly temporally correlated with  
619 electrooculography and electrocardiography data, and spatially correlated with  
620 separately acquired topographies for ocular and cardiac artifacts. Artifactual  
621 components were finally projected out of the dataset with a translation matrix.

622 The continuous artefact-corrected data were low-pass filtered (cut-off = 100Hz,  
623 Butterworth, fourth order), notch filtered between 48 and 52Hz to remove main power  
624 supply artifacts, down-sampled to 250Hz, and epoched from -1500 to 2500ms relative  
625 to motion coherence onset. EEG data were referenced to the average over electrodes.

626

#### 627 *MEEG source reconstruction*

628 MEG and EEG data were combined before inversion into source space<sup>27</sup>. The forward  
629 model (lead field) was estimated from a single shell canonical cortical mesh with >8000  
630 vertices of each participant's anatomical T1-weighted MRI image. Lead fields were  
631 calculated over a window from -1500 to 2500ms relative to motion coherence onset.  
632 The cortical mesh was co-registered to the MEEG data using the digitised fiducial and  
633 scalp points. We computed the inverse source reconstruction for single trials using the  
634 minimum norm algorithm as implemented by SPM12. All conditions were included in  
635 the inversion to ensure an unbiased linear mapping. The source images were spatially  
636 smoothed using an 8 mm FWHM Gaussian kernel.



637

638 *Dimensionality reduction*

639 To address the problem of multiple comparisons and reduce the computational load  
640 when comparing the model predictions with the source-localized time series, we  
641 applied a parcellation-based dimensionality reduction to our data following the  
642 procedure described by Colclough and colleagues<sup>37</sup>. First the whole-brain surface was  
643 parcellated into 96 anatomical regions of interest (ROIs) as defined by the Harvard-  
644 Oxford cortical brain atlas. Then we represented the dynamic of each ROI with a single  
645 time-course, obtained using principal component analysis. The reconstructed sources  
646 within each ROI were first bandpass-filtered. The coefficients of the principal  
647 component accounting for the majority of the variance of the vertices within each ROI,  
648 were then taken as an appropriate representation of source activity for that region.

649

650 **Accumulator model of perceptual and action decisions**

651 Behavioral data were analyzed using a variant of the linear ballistic accumulator (LBA)  
652 model which has been previously applied to a finger tapping task to model fMRI  
653 evidence accumulation<sup>13,30</sup>. According to this class of models, a decision about when  
654 and which action to select is dictated by a ‘race’ competition among independent  
655 accumulators. Each accumulator linearly integrates the decision-evidence (or the  
656 intention) over time in favor of one action, and the decision is made when the  
657 accumulated activity reaches threshold. In our task possible actions correspond to a  
658 button press from one of four fingers, each modeled by independent accumulators  
659  $i \in \{1, 2, 3, 4\}$ . When three valid actions are available, three accumulators are engaged

660 with activation starting at levels independently drawn from a uniform distribution  
661  $[0, c_0]$ , and increasing linearly over time with an accumulation rate ( $v$ ) drawn from an  
662 independent normal distribution with mean  $\mu_i$  and standard deviation  $\sigma_i$ .

663 A response is triggered once one accumulator wins the ‘race’ and reaches a decision  
664 bound  $b$ . When only one action is available, only the accumulator corresponding to the  
665 available action is engaged. Predicted reaction time (RT) is given by the duration of the  
666 accumulation process for the winning accumulator, plus a constant non-decision time  
667  $t_0$  representing the latency associated with stimulus encoding and motor response  
668 initiation<sup>31</sup>.

669

#### 670 *Parameter estimation and model selection*

671 To identify the combinations of free parameters that best accounted for the observed  
672 behavioral data we firstly fitted 15 variants (i.e. all possible combinations without  
673 repetition) of the LBA. Each variant was characterized by a unique combination of *free*  
674 parameters allowed to vary across trials. We followed the former procedure<sup>30</sup> to  
675 estimate the model prediction of reaction times quantiles and selection probabilities of  
676 each condition. The best-fitting parameters for each model variant were used to  
677 calculate the Bayesian Information Criterion (BIC), which penalize extra free  
678 parameters in favor of simpler models. BIC values were then used to compare the  
679 goodness-of-fit of each variant using random-effects Bayesian model comparison<sup>33,34</sup>.  
680 In this comparison, each model variant is treated as a random effect that could differ  
681 between participants. The critical statistical quantity is the probability that any given  
682 model outperforms the other variants most of the time (exceedance probability).

683

684 *Estimation of expected neural activity*

685 We generated predictions of decision-related activity from the LBA model to locate  
 686 neural signatures of decisions-evidence accumulation in single-trial analyses of MEEG  
 687 data. For multiple options, the LBA model assumes multiple active accumulators, one  
 688 for each finger option. Let  $\tilde{\mu}_W$  be the accumulation rate of the winning option (i.e. the  
 689 one reaching response threshold  $b$ ), sampled from the normal distribution  $N(\mu_W, \sigma_W^2)$ .  
 690 Let  $\tilde{\mu}_{L1}$  and  $\tilde{\mu}_{L2}$  be the sampled accumulation rates of the alternative options (i.e. the  
 691 losers), sampled from normal distributions  $N(\mu_{L1}, \sigma_{L1}^2)$ ,  $N(\mu_{L2}, \sigma_{L2}^2)$ , respectively. If  
 692 the reaction time of a given trial is  $RT$ , the latency of the accumulation process is  
 693  $RT - t_0$ , such that the expected accumulation of the winning option is:

$$694 \quad E[\tilde{\mu}_W] = \frac{b-c_0/2}{RT-t_0} \quad (3)$$

695 Since the losing accumulators have not reached the threshold by the time of the  
 696 response  $RT$ , the expected values of  $\tilde{\mu}_{L1}$  and  $\tilde{\mu}_{L2}$  are smaller than  $\tilde{\mu}_W$ . Therefore, the  
 697 losing accumulation rates have truncated normal distributions with an upper bound of  
 698  $\tilde{\mu}_W$  and with expected values of:

$$699 \quad \begin{cases} E[\tilde{\mu}_{L1} | \tilde{\mu}_{L1} < \tilde{\mu}_W] = \mu_{L1} - \sigma_{L1} \left[ \frac{\varphi\left(\frac{\tilde{\mu}_W - \mu_{L1}}{\sigma_{L1}}\right)}{\Phi\left(\frac{\tilde{\mu}_W - \mu_{L1}}{\sigma_{L1}}\right)} \right], \\ E[\tilde{\mu}_{L2} | \tilde{\mu}_{L2} < \tilde{\mu}_W] = \mu_{L2} - \sigma_{L2} \left[ \frac{\varphi\left(\frac{\tilde{\mu}_W - \mu_{L2}}{\sigma_{L2}}\right)}{\Phi\left(\frac{\tilde{\mu}_W - \mu_{L2}}{\sigma_{L2}}\right)} \right], \end{cases} \quad (4)$$

700

701 where  $\varphi(x) = \frac{1}{\sqrt{2\pi}} e^{-x^2/2}$  and  $\Phi(x) = \frac{1}{\sqrt{2\pi}} \int_{-\infty}^x e^{-x^2/2} dx$ .

702 The sum of the winning and losing accumulation rates gives an estimation of total  
703 accumulation activity for single trials. For trials with only one available option, the  
704 accumulation activity is determined by the only active accumulator.

705

### 706 **Single-trial analysis**

707 To identify the spatio-temporal profile of decision-related accumulation over the brain  
708 we derived model-predicted signals for each trial to compare with neural oscillations in  
709 theta (4 – 8 Hz), alpha (8-12 Hz), beta (12-30Hz) and gamma (31-90Hz) frequency  
710 bands. To estimate the power of oscillations on a single-trial basis, stimulus-locked  
711 epochs from 500 ms before to 1500ms after coherence onset. Next, we extracted  
712 frequency-specific signal envelope modulations using a Hilbert transform of the source  
713 data from each reconstructed ROI. The Hilbert's envelope is a convenient measure of  
714 how the power of the signal varies over time in the frequency range of interest, and thus  
715 particularly suited to capture relatively slow fluctuations associated to the instantaneous  
716 accumulation of evidence/intentions. The power estimates of individual participants  
717 were down-sampled to 100Hz and normalized by their baseline (from 400ms to 100ms  
718 before coherence onset).

719 We estimated the maximum lagged absolute Spearman correlation between the model  
720 predicted activity and the signal envelope in a trial-by-trial fashion. The lagged  
721 correlation was used to optimally split the non-decision time before and after the  
722 accumulation period to determine the time delay between the neural signal and the  
723 model predictions. The time before accumulation provides a measure of the temporal  
724 separation between coherence onset and accumulation onset.

725 If the model prediction  $x$  is a lagged version of the neural signal  $y$  so that

$$726 \quad y(t) = x(t + \tau_0) \quad (5)$$

727 Where  $\tau_0$  is a time delay that can vary from 0ms to the individual non-decision time  
728 ( $t_0$ ) with steps of 10ms, then the maximum absolute lagged correlation between  $x$   
729 and  $y$  is defined as

$$730 \quad \rho_{xy}(t) = \max |corr(y(t), x(t - \tau_i))|, \quad (6)$$

731 where  $i = [0, 10, 20 \dots t_0]$ .

732 With the peak value of  $\rho_{xy}(t)$  occurring when  $\tau_i = \tau_0$  which allows us to determine  
733 the time delay. We estimated the largest absolute lagged correlation value for each ROI  
734 and individuals by comparing concatenated epochs and model predictions. This choice  
735 permits to measure accumulation lags specific to each ROI, under the assumption that  
736 they differ across brain regions for each participant. The strength of the Fisher-  
737 transformed maximum lagged correlations for each ROI was then quantified (z-score)  
738 using a one-sample sign-test. To provide a conservative estimate of significant  
739 correlations between model prediction and neural activity, we repeated the above  
740 procedure 10,000 times, each iteration using a different phase-randomized version of  
741 the original MEEG signal, to obtain a distribution of correlations under chance. Two-  
742 tailed statistical significance was assessed by computing the proportion of absolute  
743 values of the distribution of correlations generated by chance exceeding the correlation  
744 between model predictions and the original MEEG signal. The resulting p-values were  
745 corrected for multiple comparisons (False Discovery Rate) across ROIs and frequency  
746 bands.

747

748 **Connectivity analysis**

749 To explore the direction of the information flow we employed phase-transfer entropy,  
750 a data-driven effective-connectivity measure robust to signal leakage<sup>28</sup>. The preferred  
751 direction of information between ROIs whose activity best matched with model's  
752 predicted activity was estimated using the directed phase-transfer entropy.

753 To identify the ROIs that preferentially accumulated evidence for perception or action  
754 decisions, the average information flow (quantified by phase transfer entropy) sent by  
755 each ROI was calculated for each subject and condition. The difference of information  
756 flow between uncertainty levels for perception and action is compared at the ROI level  
757 with a surrogate distribution generated by flipping the condition labels for a random  
758 number of participants (10.000 iterations). Since significance was estimated separately  
759 for perception and action, the critical value for the FDR correction was halved to  
760  $\alpha = 0.025$ .

761 To quantify the direction of information flow, we calculated a posterior to anterior  
762 index (PAX) as implemented by Hillebrand et al, 2016. A positive PAX indicates  
763 preferential flow from posterior regions toward anterior regions. ROIs were split into  
764 anterior and posterior region with respect to the precentral gyrus (see Table S1).  
765 Significance was assessed with permutation testing where the average directional  
766 phase-transfer entropies were shuffled across ROIs and PAX was estimated. This  
767 procedure was repeated 10.000 times to generate a surrogate distribution of PAX values  
768 against which the observed PAX values were tested ( $p < 0.025$  to account for multiple  
769 comparisons).

770 For the correlations in **Figure 6a**, we first confirmed homoscedasticity of our data  
771 and then calculated bootstrapped Pearson's correlations. For the correlations in  
772 **Figure 6b** we used repeated-measures correlation (as implemented in the rmcrr  
773 package in R) which accounts for non-independence among observations due to  
774 multiple measurements per participant. The resulting p-values were corrected for  
775 multiple comparisons by applying Holm-Bonferroni correction.

### 776 **Hypothesis testing**

777 Differences in reaction times were tested with a 2-way repeated measures ANOVA  
778 (Low/High Uncertainty x Action/Perception). All other hypothesis tests used non-  
779 parametric tests or random permutation methods that do not rely on specific  
780 assumptions about the distributions of data values. All tests were evaluated at the  
781  $p < 0.05$  level (two-tailed), correcting for multiple comparisons where appropriate.

782 **References:**

- 783 1. Humphreys, G. W. *et al.* in *Attention in action* 3–25 (2004).
- 784 2. Milner, A. D. *et al.* Perception and action in ‘visual form agnosia’. *Brain* **114** (  
785 **Pt 1**, 405–28 (1991).
- 786 3. Crutch, S. J., Yong, K. X. X. & Shakespeare, T. J. Looking but Not Seeing:  
787 Recent Perspectives on Posterior Cortical Atrophy. *Curr. Dir. Psychol. Sci.* **25**,  
788 251–260 (2016).
- 789 4. Philiastides, M. G. & Sajda, P. EEG-Informed fMRI Reveals Spatiotemporal  
790 Characteristics of Perceptual Decision Making. *J. Neurosci.* **27**, 13082–13091  
791 (2007).
- 792 5. Rae, C. L., Hughes, L. E., Weaver, C., Anderson, M. C. & Rowe, J. B.  
793 Selection and stopping in voluntary action: a meta-analysis and combined  
794 fMRI study. *Neuroimage* **86**, 381–91 (2014).
- 795 6. Rushworth, M. F. S., Noonan, M. P., Boorman, E. D., Walton, M. E. &  
796 Behrens, T. E. Frontal Cortex and Reward-Guided Learning and Decision-  
797 Making. *Neuron* **70**, 1054–1069 (2011).
- 798 7. Wang, X. J. Probabilistic decision making by slow reverberation in cortical  
799 circuits. *Neuron* **36**, 955–968 (2002).
- 800 8. Zhang, J. The effects of evidence bounds on decision-making: Theoretical and  
801 empirical developments. *Front. Psychol.* **3**, 1–19 (2012).
- 802 9. Wald, A. & Wolfowitz, J. Bayes Solutions of Sequential Decision Problems.  
803 *Ann. Math. Stat.* **21**, 82–99 (1950).
- 804 10. Gold, J. I. & Shadlen, M. N. The neural basis of decision making. *Annu. Rev.*  
805 *Neurosci.* **30**, 535–74 (2007).
- 806 11. Roitman, J. D. & Shadlen, M. N. Response of neurons in the lateral  
807 intraparietal area during a combined visual discrimination reaction time task. *J.*  
808 *Neurosci.* **22**, 9475–9489 (2002).



- 809 12. Pesaran, B., Nelson, M. J. & Andersen, R. A. Free choice activates a decision  
810 circuit between frontal and parietal cortex. *Nature* **453**, 406–409 (2008).
- 811 13. Rowe, J. B., Hughes, L. & Nimmo-Smith, I. Action selection: a race model for  
812 selected and non-selected actions distinguishes the contribution of premotor  
813 and prefrontal areas. *Neuroimage* **51**, 888–96 (2010).
- 814 14. Freedman, D. J. & Ibos, G. An Integrative Framework for Sensory, Motor, and  
815 Cognitive Functions of the Posterior Parietal Cortex. *Neuron* **97**, 1219–1234  
816 (2018).
- 817 15. Spitzer, B. & Haegens, S. Beyond the Status Quo: A Role for Beta Oscillations  
818 in Endogenous Content (Re-) Activation. *Eneuro* **4**, ENEURO.0170-17.2017  
819 (2017).
- 820 16. Freedman, D. J. & Assad, J. A. A proposed common neural mechanism for  
821 categorization and perceptual decisions. *Nat. Neurosci.* **14**, 143–146 (2011).
- 822 17. Najafi, F. & Churchland, A. K. Perceptual Decision-Making: A Field in the  
823 Midst of a Transformation. *Neuron* **100**, 453–462 (2018).
- 824 18. Sternberg, S. High-Speed Scanning in Human Memory. *Science (80-. ).* **153**,  
825 652–654 (1966).
- 826 19. McClelland, J. L. On the time relations of mental processes: An examination of  
827 systems of processes in cascade. *Psychol. Rev.* **86**, 287–330 (1979).
- 828 20. Polanía, R., Krajbich, I., Grueschow, M. & Ruff, C. C. Neural oscillations and  
829 synchronization differentially support evidence accumulation in perceptual and  
830 value-based decision making. *Neuron* **82**, 709–20 (2014).
- 831 21. Shipp, S., Adams, R. A. & Friston, K. J. Reflections on agranular architecture:  
832 Predictive coding in the motor cortex. *Trends Neurosci.* **36**, 706–716 (2013).
- 833 22. Bonaiuto, J. J. *et al.* Lamina-specific cortical dynamics in human visual and  
834 sensorimotor cortices. *Elife* 1–32 (2018). doi:10.7554/eLife.33977
- 835 23. Polanía, R., Krajbich, I., Grueschow, M. & Ruff, C. C. Neural Oscillations and

- 836 Synchronization Differentially Support Evidence Accumulation in Perceptual  
837 and Value-Based Decision Making. *Neuron* **82**, 709–720 (2014).
- 838 24. Hughes, L. E., Rittman, T., Robbins, T. W. & Rowe, J. B. Reorganization of  
839 cortical oscillatory dynamics underlying disinhibition in frontotemporal  
840 dementia. *Brain* **141**, 2486–2499 (2018).
- 841 25. Haegens, S. *et al.* Beta oscillations in the monkey sensorimotor network reflect  
842 somatosensory decision making. *Proc. Natl. Acad. Sci.* **108**, 10708–10713  
843 (2011).
- 844 26. Donner, T. H. *et al.* Population Activity in the Human Dorsal Pathway Predicts  
845 the Accuracy of Visual Motion Detection. *J. Neurosci.* **98**, 345–359 (2007).
- 846 27. Henson, R. N., Mouchlianitis, E. & Friston, K. J. MEG and EEG data fusion :  
847 Simultaneous localisation of face- evoked responses. *Neuroimage* **47**, 581–589  
848 (2010).
- 849 28. Hillebrand, A. *et al.* Direction of information flow in large-scale resting-state  
850 networks is frequency-dependent. *Proc. Natl. Acad. Sci.* **113**, 3867–3872  
851 (2016).
- 852 29. Shadlen, M. N. & Newsome, W. T. Motion perception: seeing and deciding.  
853 *Proc. Natl. Acad. Sci.* **93**, 628–633 (1996).
- 854 30. Zhang, J., Hughes, L. E. & Rowe, J. B. Selection and inhibition mechanisms  
855 for human voluntary action decisions. *Neuroimage* **63**, 392–402 (2012).
- 856 31. Brown, S. D. & Heathcote, A. The simplest complete model of choice response  
857 time: Linear ballistic accumulation. *Cogn. Psychol.* **57**, 153–178 (2008).
- 858 32. Cassey, P., Heathcote, A. & Brown, S. D. Brain and Behavior in Decision-  
859 Making. *PLoS Comput. Biol.* **10**, (2014).
- 860 33. Stephan, K. E., Penny, W. D., Daunizeau, J., Moran, R. J. & Friston, K. J.  
861 Bayesian model selection for group studies. *Neuroimage* **46**, 1004–17 (2009).
- 862 34. Tomassini, A., Ruge, D., Galea, J. M., Penny, W. & Bestmann, S. The role of

- 863 dopamine in temporal uncertainty. *J. Cogn. Neurosci.* **28**, (2016).
- 864 35. Resulaj, A., Kiani, R., Wolpert, D. M. & Shadlen, M. N. Changes of mind in  
865 decision-making. *Nature* **461**, 263–266 (2009).
- 866 36. Drugowitsch, J., Moreno-Bote, R., Churchland, a. K., Shadlen, M. N. &  
867 Pouget, a. The Cost of Accumulating Evidence in Perceptual Decision  
868 Making. *J. Neurosci.* **32**, 3612–3628 (2012).
- 869 37. Colclough, G. L., Brookes, M. J., Smith, S. M. & Woolrich, M. W. A  
870 symmetric multivariate leakage correction for MEG connectomes. *Neuroimage*  
871 **117**, 439–448 (2015).
- 872 38. Kiebel, S. J. & Friston, K. J. Statistical parametric mapping for event-related  
873 potentials: I. Generic considerations. *Neuroimage* **22**, 492–502 (2004).
- 874 39. Caballero, J. A., Humphries, M. D. & Gurney, K. N. *A probabilistic,*  
875 *distributed, recursive mechanism for decision-making in the brain.* *PLoS*  
876 *Computational Biology* **14**, (2018).
- 877 40. Park, I. M., Meister, M. L. R., Huk, A. C. & Pillow, J. W. Encoding and  
878 decoding in parietal cortex during sensorimotor decision-making. *Nat.*  
879 *Neurosci.* **17**, 1395–1403 (2014).
- 880 41. Meister, M. L. R., Hennig, J. A. & Huk, A. C. Signal multiplexing and single-  
881 neuron computations in lateral intraparietal area during decision-making. *J.*  
882 *Neurosci.* **33**, 2254–2267 (2013).
- 883 42. Donner, T. H., Siegel, M., Fries, P. & Engel, A. K. Buildup of Choice-  
884 Predictive Activity in Human Motor Cortex during Perceptual Decision  
885 Making. *Curr. Biol.* **19**, 1581–1585 (2009).
- 886 43. O’Connell, R. G., Dockree, P. M. & Kelly, S. P. A supramodal accumulation-  
887 to-bound signal that determines perceptual decisions in humans. *Nat. Neurosci.*  
888 **15**, 1729–1735 (2012).
- 889 44. Wyart, V., de Gardelle, V., Scholl, J. & Summerfield, C. Rhythmic  
890 Fluctuations in Evidence Accumulation during Decision Making in the Human

- 891 Brain. *Neuron* **76**, 847–858 (2012).
- 892 45. Gould, I. C., Nobre, a. C., Wyart, V. & Rushworth, M. F. S. Effects of  
893 Decision Variables and Intraparietal Stimulation on Sensorimotor Oscillatory  
894 Activity in the Human Brain. *J. Neurosci.* **32**, 13805–13818 (2012).
- 895 46. Kopell, N., Ermentrout, G. B., Whittington, M. A. & Traub, R. D. Gamma  
896 rhythms and beta rhythms have different synchronization properties. *Proc.*  
897 *Natl. Acad. Sci.* **97**, 1867–1872 (2000).
- 898 47. Philiastides, M. G., Ratcliff, R. & Sajda, P. Neural representation of task  
899 difficulty and decision making during perceptual categorization: a timing  
900 diagram. *J. Neurosci.* **26**, 8965–8975 (2006).
- 901 48. Kiani, R., Hanks, T. D. & Shadlen, M. N. Bounded integration in parietal  
902 cortex underlies decisions even when viewing duration is dictated by the  
903 environment. *J Neurosci* **28**, 3017–3029 (2008).
- 904 49. Kerns, J. G. *et al.* Anterior cingulate conflict monitoring and adjustments in  
905 control. *Science* **303**, 1023–6 (2004).
- 906 50. Mueller, V. A., Brass, M., Waszak, F. & Prinz, W. The role of the preSMA and  
907 the rostral cingulate zone in internally selected actions. *Neuroimage* **37**, 1354–  
908 1361 (2007).
- 909 51. Kubanek, J., Snyder, L. H., Brunton, B. W., Brody, C. D. & Schalk, G. A low-  
910 frequency oscillatory neural signal in humans encodes a developing decision  
911 variable. *Neuroimage* **83**, 795–808 (2013).
- 912 52. Pesaran, B. & Freedman, D. J. Where Are Perceptual Decisions Made in the  
913 Brain? *Trends Neurosci.* **39**, 642–644 (2016).
- 914 53. Grinband, J., Hirsch, J. & Ferrera, V. P. A neural representation of  
915 categorization uncertainty in the human brain. *Neuron* **49**, 757–763 (2006).
- 916 54. Klaes, C., Westendorff, S., Chakrabarti, S. & Gail, A. Choosing Goals, Not  
917 Rules: Deciding among Rule-Based Action Plans. *Neuron* **70**, 536–548 (2011).

- 918 55. Gherman, S. & Philiastides, M. G. Human VMPFC encodes early signatures of  
919 confidence in perceptual decisions. *Elife* **7**, 1–28 (2018).
- 920 56. Mendoza-Halliday, D., Torres, S. & Martinez-Trujillo, J. C. Sharp emergence  
921 of feature-selective sustained activity along the dorsal visual pathway. *Nat.*  
922 *Neurosci.* **17**, 1255–1262 (2014).
- 923 57. Fries, P. Rhythms for Cognition: Communication through Coherence. *Neuron*  
924 **88**, 220–235 (2015).
- 925 58. Selen, L. P. J., Shadlen, M. N. & Wolpert, D. M. Deliberation in the Motor  
926 System: Reflex Gains Track Evolving Evidence Leading to a Decision. *J.*  
927 *Neurosci.* **32**, 2276–2286 (2012).
- 928 59. Shipp, S. Neural elements for predictive coding. *Front. Psychol.* **7**, 1–21  
929 (2016).
- 930 60. Bastos, A. M. *et al.* Canonical Microcircuits for Predictive Coding. *Neuron* **76**,  
931 695–711 (2012).
- 932 61. Friston, K. *et al.* The anatomy of choice: active inference and agency. *Front.*  
933 *Hum. Neurosci.* **7**, 1–18 (2013).
- 934 62. Holmes, C. D., Papadimitriou, C. & Snyder, L. H. Dissociation of LFP power  
935 and tuning in the frontal cortex during memory. *J. Neurosci.* **38**, 3629–17  
936 (2018).
- 937 63. Haegens, S., Vergara, J., Rossi-Pool, R., Lemus, L. & Romo, R. Beta  
938 oscillations reflect supramodal information during perceptual judgment. *Proc.*  
939 *Natl. Acad. Sci.* **114**, 13810–13815 (2017).
- 940 64. Haenschel, C., Baldeweg, T., Croft, R. J., Whittington, M. & Gruzelier, J.  
941 Gamma and beta frequency oscillations in response to novel auditory stimuli:  
942 A comparison of human electroencephalogram (EEG) data with in vitro  
943 models. *Proc. Natl. Acad. Sci.* **97**, 7645–7650 (2000).
- 944 65. Traub, R. D., Whittington, M. A., Buhl, E. H., Jefferys, J. G. & Faulkner, H. J.  
945 On the mechanism of the gamma --> beta frequency shift in neuronal

- 946 oscillations induced in rat hippocampal slices by tetanic stimulation. *J.*  
947 *Neurosci.* **19**, 1088–1105 (1999).
- 948 66. Buffalo, E. A., Fries, P., Landman, R., Buschman, T. J. & Desimone, R.  
949 Laminar differences in gamma and alpha coherence in the ventral stream. *Proc.*  
950 *Natl. Acad. Sci.* **108**, 11262–11267 (2011).
- 951 67. Bastos, A. M., Loonis, R., Kornblith, S., Lundqvist, M. & Miller, E. K.  
952 Laminar recordings in frontal cortex suggest distinct layers for maintenance  
953 and control of working memory. *Proc. Natl. Acad. Sci.* **115**, 1117–1122 (2018).
- 954 68. Aukstulewicz, R. *et al.* Not All Predictions Are Equal: “What” and “When”  
955 Predictions Modulate Activity in Auditory Cortex through Different  
956 Mechanisms. *J. Neurosci.* **38**, 8680–8693 (2018).
- 957 69. Olufsen, M. S., Whittington, M. A., Camperi, M. & Kopell, N. New roles for  
958 the gamma rhythm: Population tuning and preprocessing for the beta rhythm. *J.*  
959 *Comput. Neurosci.* **14**, 33–54 (2003).
- 960 70. Allen, W. E. *et al.* Global Representations of Goal-Directed Behavior in  
961 Distinct Cell Types of Mouse Neocortex. *Neuron* **94**, 891–907.e6 (2017).
- 962 71. Katz, L., Yates, J., Pillow, J. W. & Huk, A. Dissociated functional significance  
963 of choice-related activity across the primate dorsal stream. *Nature* **535**, Salt  
964 Lake City USA (2016).
- 965 72. Siegel, M., Engel, A. K. & Donner, T. H. Cortical network dynamics of  
966 perceptual decision-making in the human brain. *Front. Hum. Neurosci.* **5**, 21  
967 (2011).
- 968 73. Cisek, P. & Kalaska, J. F. Neural Mechanisms for Interacting with a World  
969 Full of Action Choices. *Annu. Rev. Neurosci.* **33**, 269–298 (2010).
- 970 74. Forstmann, B. U., Ratcliff, R. & Wagenmakers, E.-J. Sequential Sampling  
971 Models in Cognitive Neuroscience: Advantages, Applications, and Extensions.  
972 *Annu. Rev. Psychol.* **67**, 641–66 (2016).

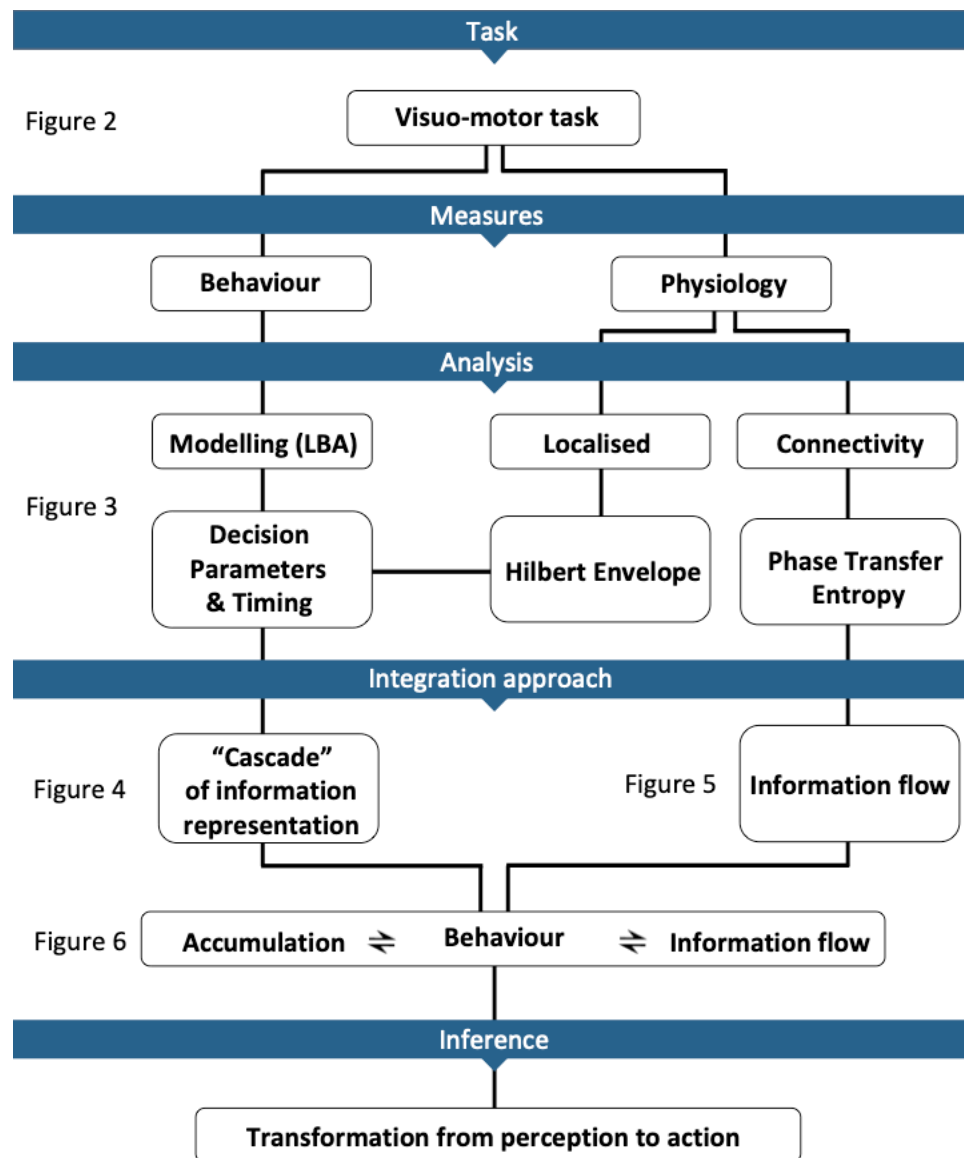

973 **Figure 1: Overview of the study.** We combined behavioural, computational, and  
 974 neuroimaging approaches to provide an integrated perspective of the decision  
 975 processes linking perception to action. Each section is expanded in a subsequent  
 976 figure, as directed.

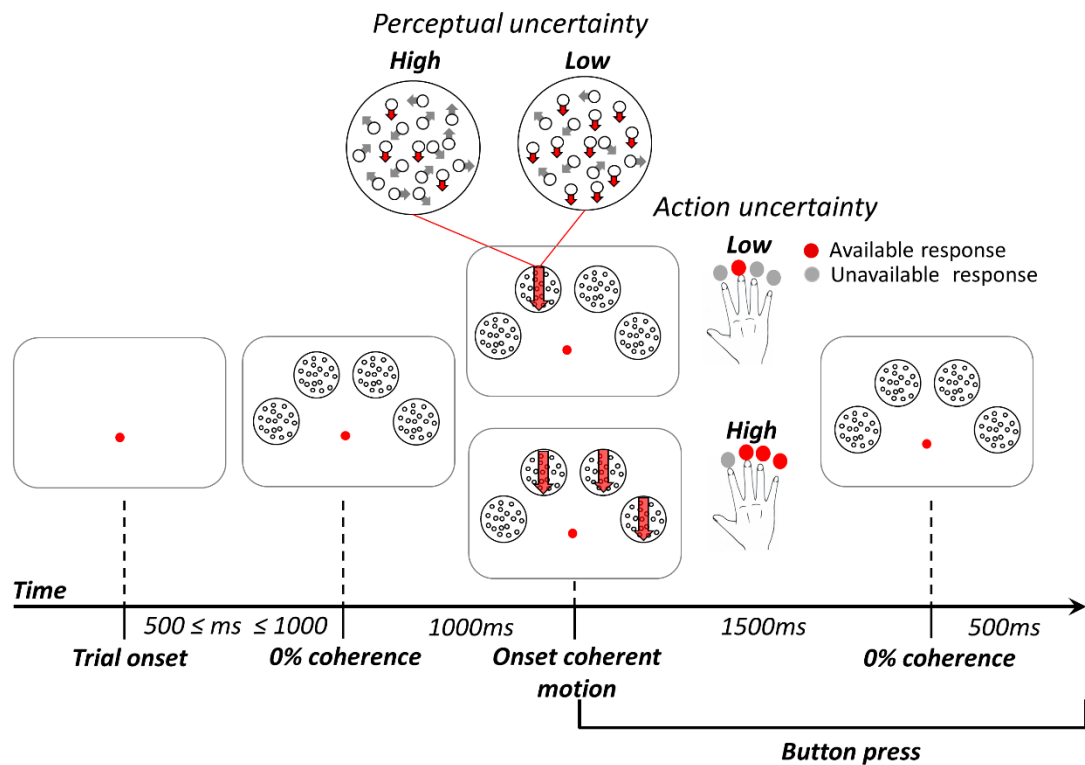

977 **Figure 2: Experimental manipulation of perceptual and action uncertainty.**  
978 Participants pressed the button corresponding to the coherent stimulus (red downward  
979 arrow). When there were more than one coherent stimulus, they selected one response  
980 and pressed the corresponding button. Perceptual uncertainty was manipulated by  
981 changing the coherence of dot motion (i.e. by changing the motion strength), whereas  
982 action uncertainty was manipulated by changing the number of available options (i.e.  
983 the number of coherent stimuli to choose from). Perceptual and action uncertainty  
984 varied across trials in a 2 by 2 factorial design.



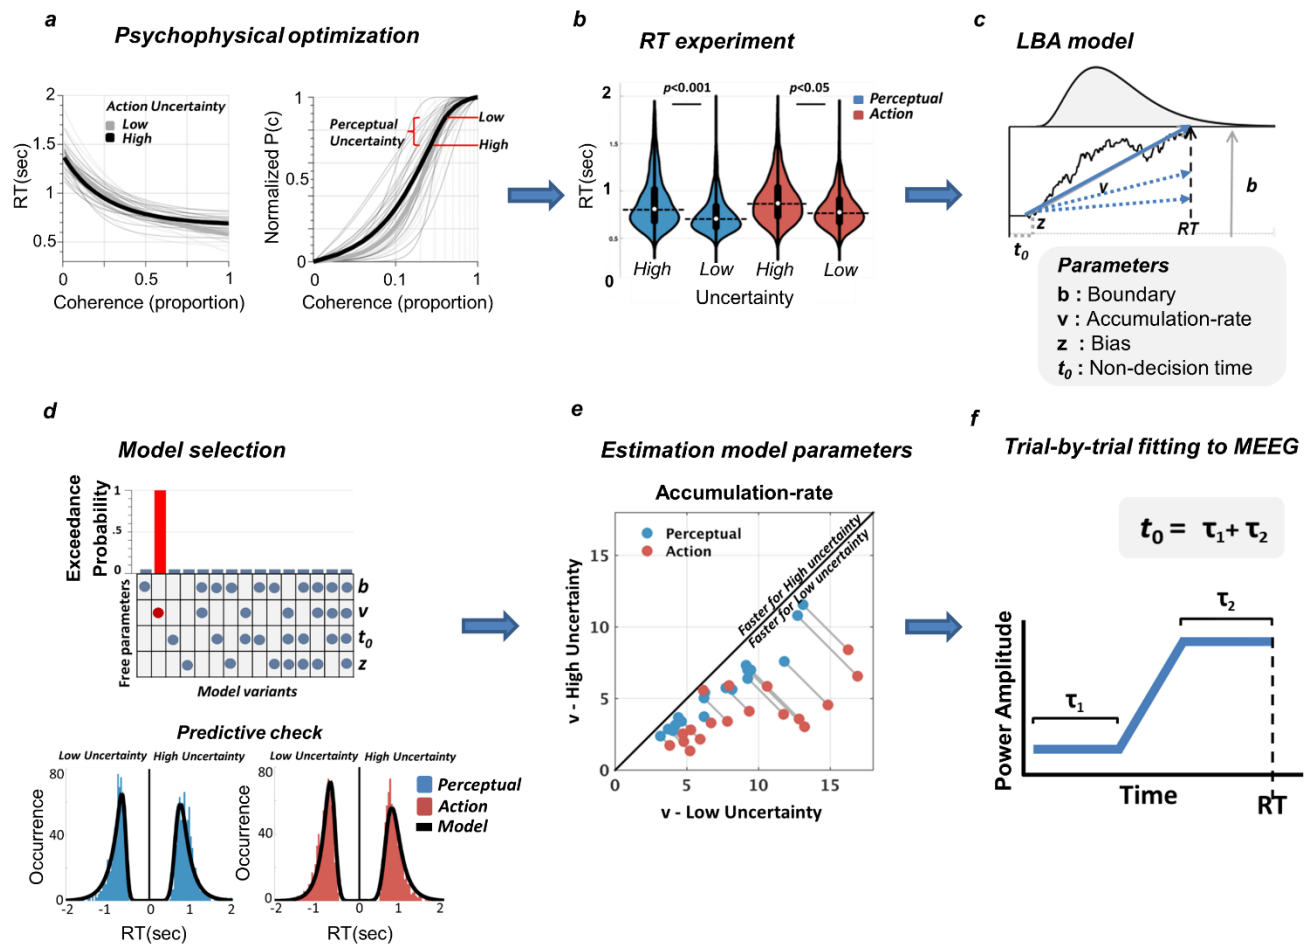

985 **Figure 3: Uncertainty modulates reaction times and the speed of decision**  
 986 **evidence accumulation.** **a** Decision evidence was titrated to the participants’  
 987 individual motion sensitivity: Individual motion thresholds for each trial type was  
 988 measured on a session preceding the scan. Reaction times (left panel) and accuracy  
 989 (right panel) varied with motion strength (grey lines: individual data, black tick lines:  
 990 mean data). Low and High perceptual uncertainty were estimated at the 75% and 90%  
 991 accuracy levels, respectively. **b** During the experiment, reaction times were  
 992 modulated by both perceptual and action uncertainty, confirming the efficacy of our  
 993 manipulations (aggregated data for uncertainty type, rm-ANOVA on log-transformed  
 994 reaction times). **c** The task was modelled using a race accumulation model (Linear  
 995 ballistic accumulator, LBA). In this model, noisy evidence is integrated over time at a  
 996 given rate ( $v$ ) up to an absorbing decision bound ( $b$ ). Each option is represented by  
 997 one accumulator racing to reach the bound. The fastest accumulator (thick blue arrow)  
 998 determines the choice. Non-decision time linked to sensorial and motor processes ( $t_0$ )  
 999 sums to the evidence accumulation time to produce reaction-times. **d** Bayesian model

1000 comparison revealed that changes in the sole drift-rate best accounted for the  
1001 behavioral data. The quality of fit is also seen in the comparison of empirical reaction  
1002 time distributions for each condition, against data simulated using the optimal model  
1003 and its parameters. **e** The model predicted faster accumulation of decision evidence  
1004 when uncertainty is low for both action and perceptual uncertainty (grey lines  
1005 connects data points from each participant). **f** Model predicted activity was fitted to  
1006 the power envelope of the MEEG signal in a trial-by-trial fashion to identify  
1007 accumulators of decision evidence. Non decision time ( $t_0$ ) was decomposed into pre-  
1008 accumulation ( $\tau_1$ ) and post-accumulation ( $\tau_2$ ) time reflecting perceptual and  
1009 motor processes, respectively. This allowed us to identify the latencies of different  
1010 accumulators across the brain and to draw time-resolved maps of the flow of  
1011 information from perception to action.

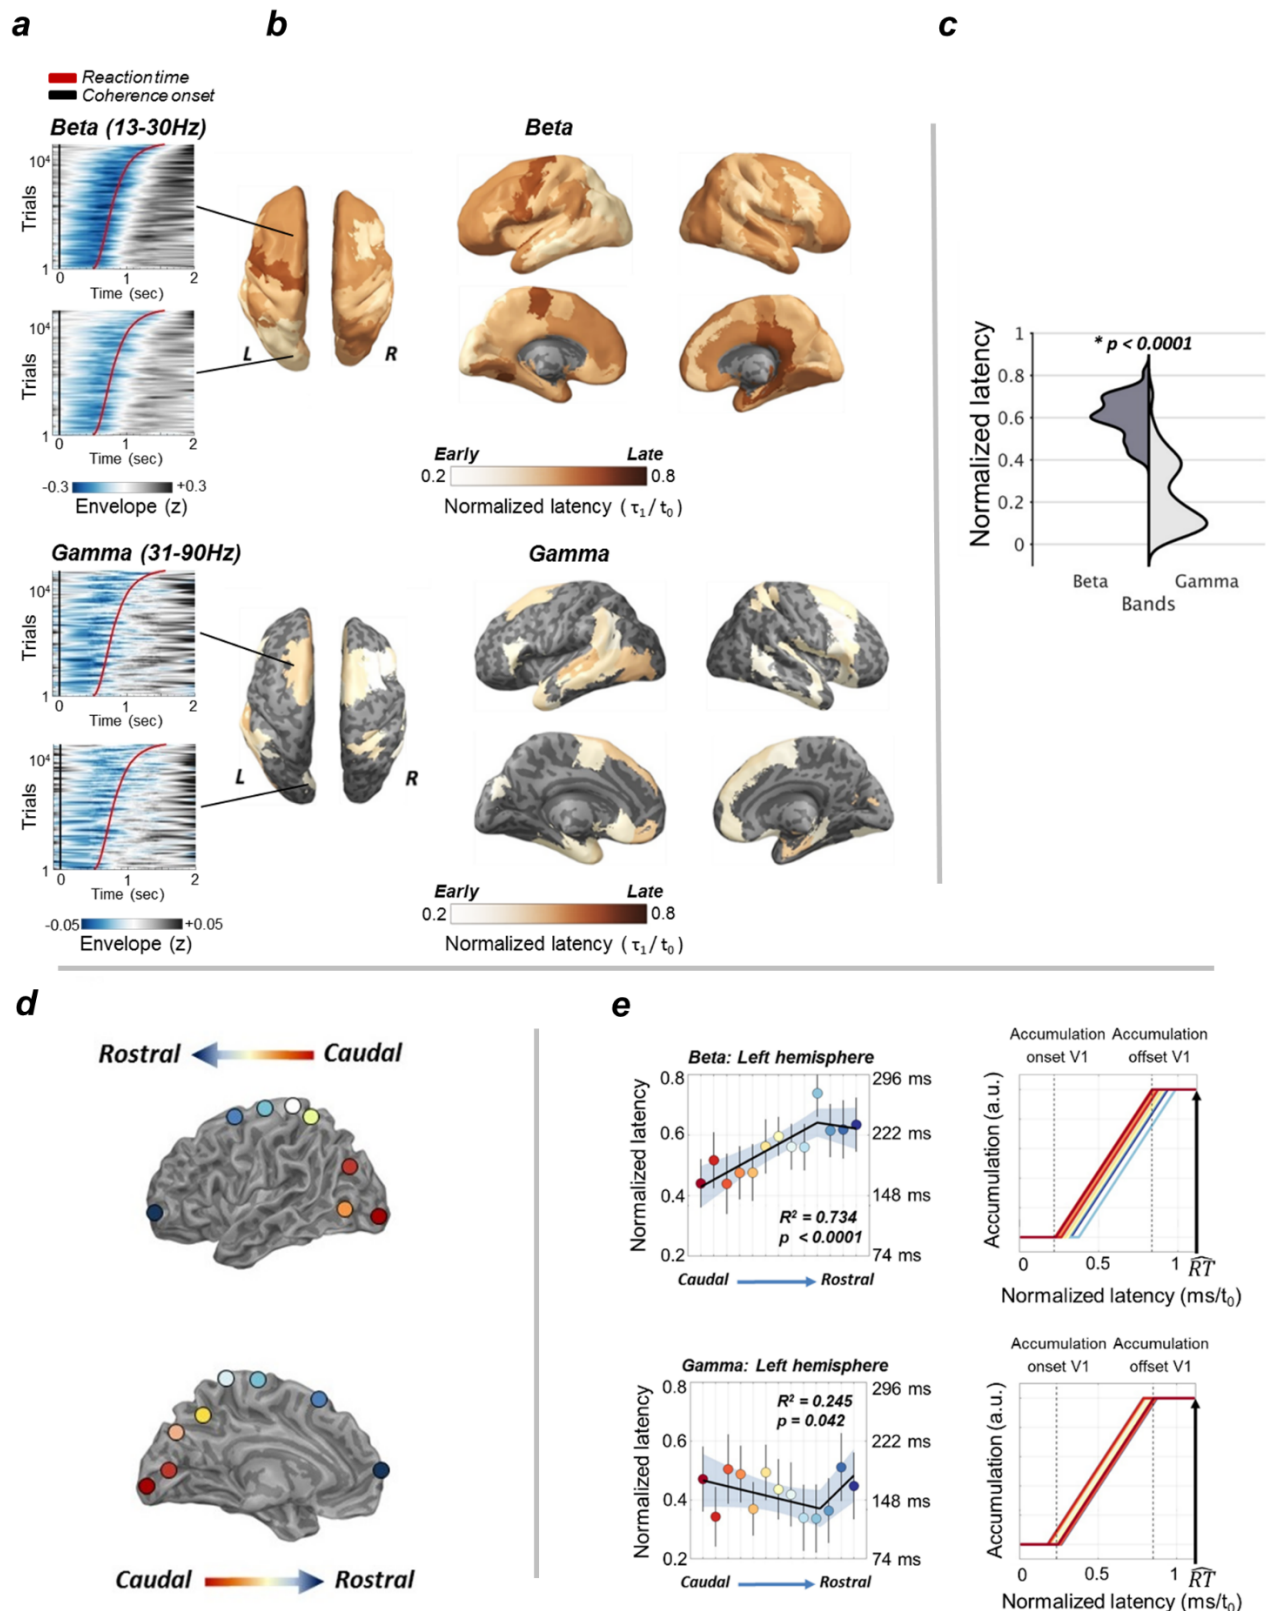

1012 **Figure 4: Temporal cascade of information-representation revealed by**  
 1013 **comparing trial-by-trial MEEG power envelopes to model's predictions.**  
 1014 **a** Power plots ranked by reaction-times showing the temporal relationship between  
 1015 signal power envelope (z-scored with regard to each individual's baseline average)

1016 and reaction times (red curve) at representative ROIs showed separately for Beta band  
1017 (top row) and gamma band (bottom row). The ordinate of each plot represents  
1018 individual trials pooled across participants and sorted according to reaction times. The  
1019 black line indicates motion coherence onset. **b** Latency maps showing the normalized  
1020 latencies (each accumulation onset time divided by individual non-decision time) of  
1021 decision-evidence accumulation across anatomical regions where correlations  
1022 between power-envelopes and model's predictions survived random permutation  
1023 testing (see Methods). **c** Decision-evidence accumulation in the gamma band precedes  
1024 beta (top panel). ROIs along the dorsal path color-coded with respect to their position  
1025 along the caudo-rostro axis **d** ROIs along the dorsal path are ranked based on their y-  
1026 coordinate value. **e** Decision-evidence accumulation mediated by beta follows a  
1027 caudo-rostral gradient along the dorsal path of the contralateral hemisphere. A  
1028 piecewise regression (top left panel) best describes the gradient showing that latencies  
1029 increase from visual areas up to M1 in the precentral gyrus and decrease afterwards  
1030 suggesting two separate converging flows (Error bars indicate SEM, shaded area  
1031 covers bootstrapped 95% regression CI). The pattern is inverted for gamma where  
1032 latencies increase while proceeding from M1 to posterior and anterior ROIs. Despite  
1033 the differences in latencies along the gradient, the cascade of information-  
1034 representation is quasi-parallel. The right panels show that the latest ROI in the  
1035 gradient starts accumulating decision-evidence before the earliest ROI (e.g. V1 for  
1036 beta) has reached the decision boundary.  $\hat{RT}$  is the mean reaction time (across  
1037 trials and participants) normalized by the mean non-decision time ( $t_0$ ).

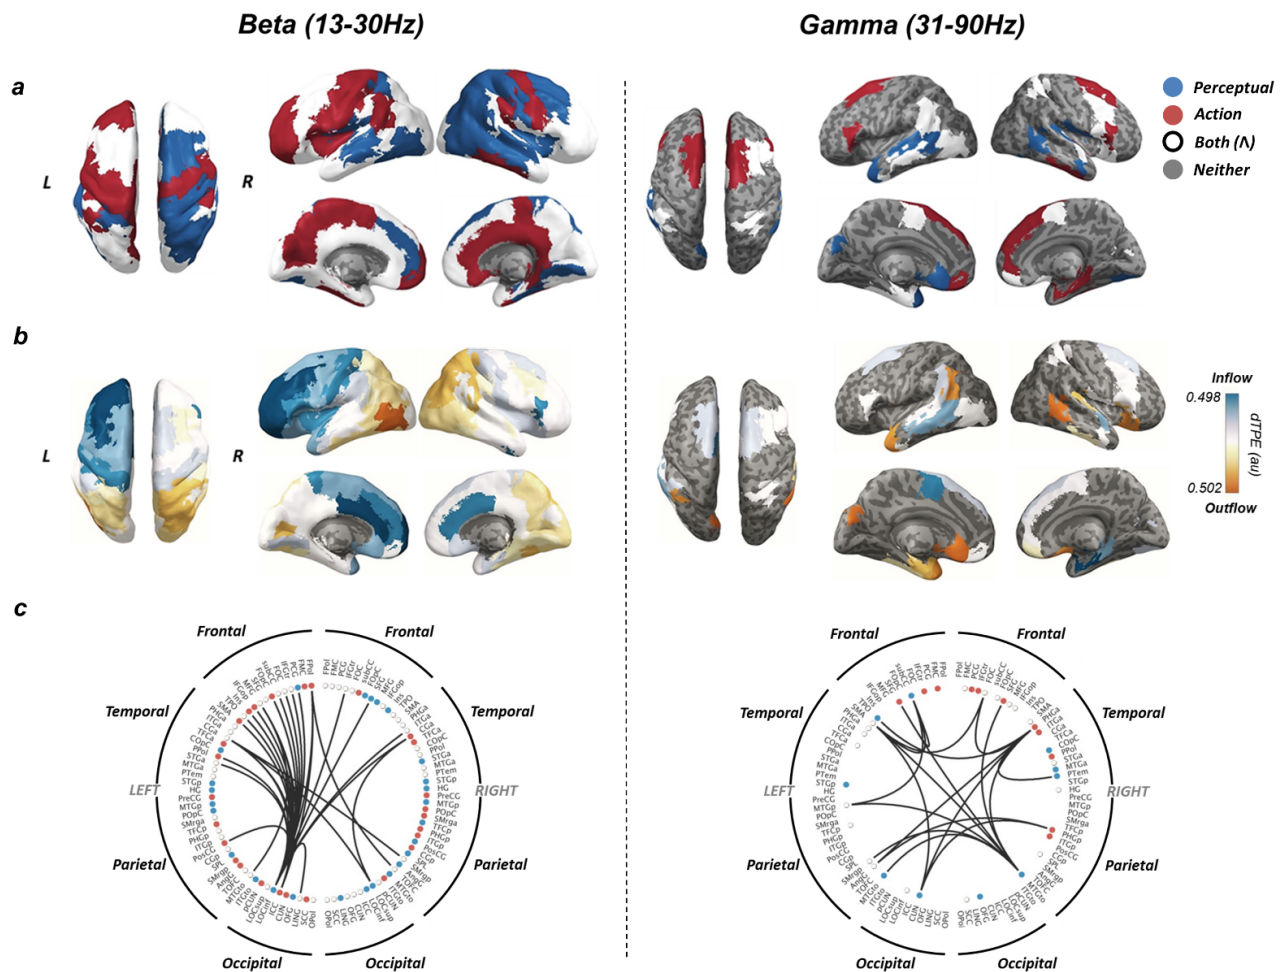

1038 **Figure 5: Sensitivity to uncertainty and information flow, show distinct**  
 1039 **spatiotemporal gradients.** **a** Differences in phase transfer entropy between  
 1040 manipulations of perceptual and action uncertainty for beta (left column) and gamma  
 1041 (right column) allows to define regions accumulating information specific to  
 1042 perception and action decision. **b** Information flow (directional phase transfer  
 1043 entropy) shows a clear rostro-caudal gradient in beta with MT-complex and the  
 1044 frontal regions being the strongest sender and receiver of information, respectively. **c**  
 1045 Thresholded connectivity plots. Beta activity reflects transmission of information  
 1046 across distant cortical regions mostly within the left hemisphere. Gamma shows a  
 1047 more local activity with no clear lateralization. The full names of the ROIs are given  
 1048 in the **Supplementary Table 2**.

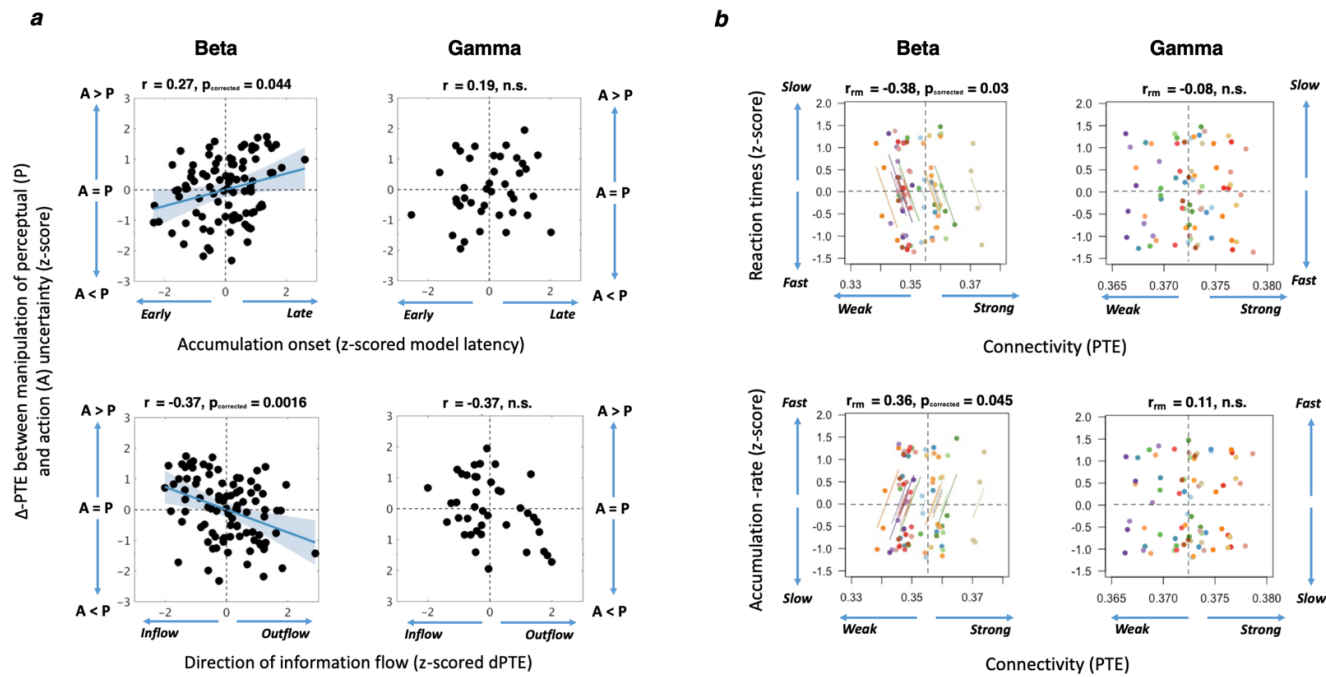

1049 **Figure 6: Information flow is stronger under low uncertainty and associated**  
 1050 **with faster reaction times and larger model accumulation-rates.** **a** Specificity to  
 1051 uncertainty manipulations correlated with model latency (top row) and direction of  
 1052 information flow (bottom row). Perceptual regions tend to show shorter latencies and  
 1053 to drive information transmission more than action regions. Points show z-scores of  
 1054 median values across subjects for each ROI (96 beta ROIs, 40 gamma ROIs). Shaded  
 1055 area covers bootstrapped 95% CI **b** Repeated-measures correlations. Reaction times  
 1056 (top-row) and accumulation-rates (bottom row) correlated with phase transfer entropy  
 1057 in the beta (left column) and gamma (right column) band. Points show median values  
 1058 for the four tested conditions. Data from the same participant are displayed in the  
 1059 same color, with the corresponding lines showing the individual fit of the repeated-  
 1060 measures correlation.
