# Supplementary material for: On the evolution of neural decisions from uncertain visual input to uncertain actions
Source: bioRxiv or medRxiv preprint supplement (doi:10.1101/803049), 2020-05-15
Supplement: Supplementary file [file media-1.pdf]

## Supplementary Figures and Tables

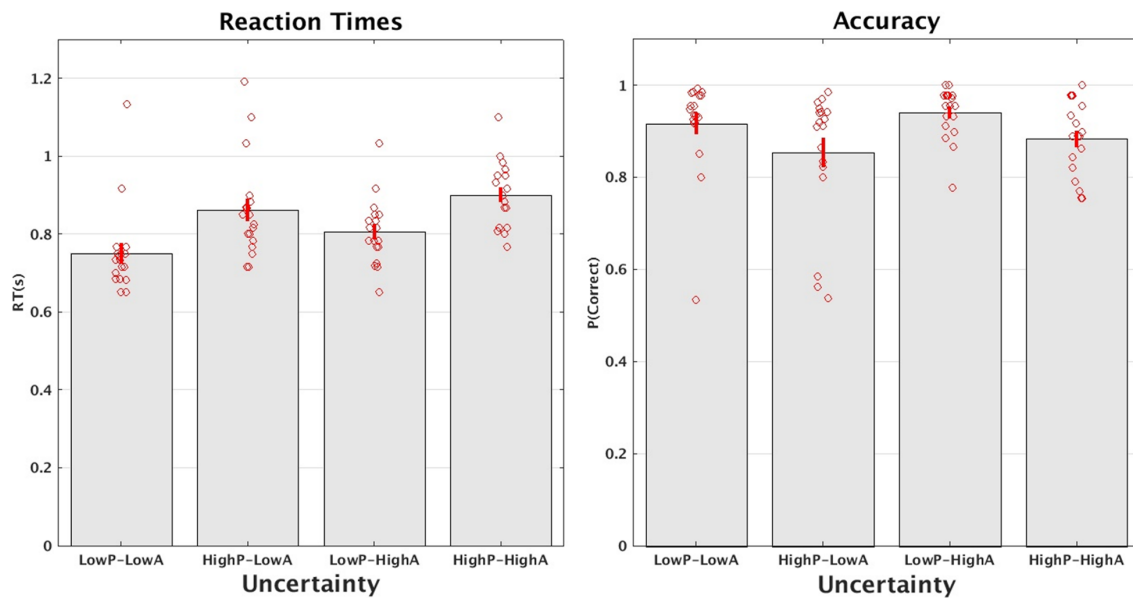

1

2 **Figure S1 Behavioural performance during scan.** Reaction times (left panel) for each manipulation  
3 level. Accuracy levels (right panel) for each manipulation level. To compare between conditions with  
4 different number of options (i.e. low and high action uncertainty) accuracy is normalised with  
5 respect to the probability to respond correctly when guessing (i.e. chance level) as follows: (accuracy  
6 – chance)/(1-chance). Chance levels are 25 % and 75% for low and high uncertainty, respectively.  
7 Red dots indicate individual data, error-bars represent standard error of mean.

8

9

10

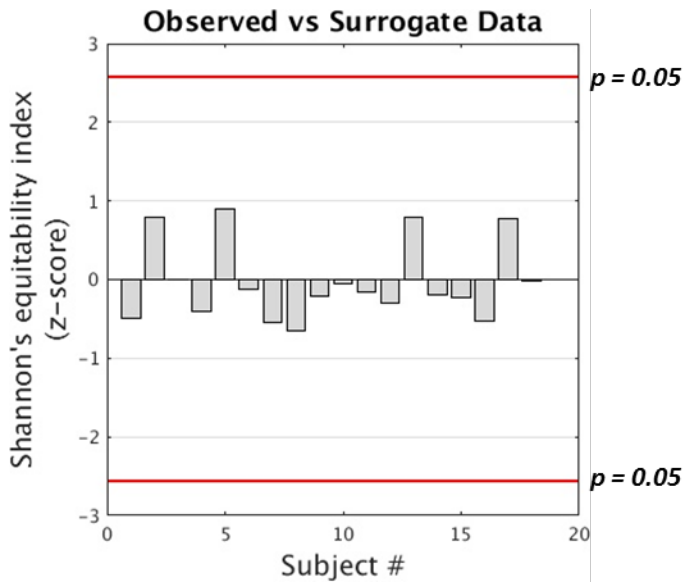

11

12

13

14 **Figure S2. Shannon's equitability index** quantifies how much a given choice is biased by previous  
15 responses. Permutation tests showed that Shannon's equitability index estimated from participants'  
16 responses did not differ significantly from that generated by random permutations of trials order  
17 (red lines show the Bonferroni-corrected significance threshold of  $p = 0.05$ ; two-tailed). This confirms  
18 that over a series of trials subjects' choices were not biased by previous responses.

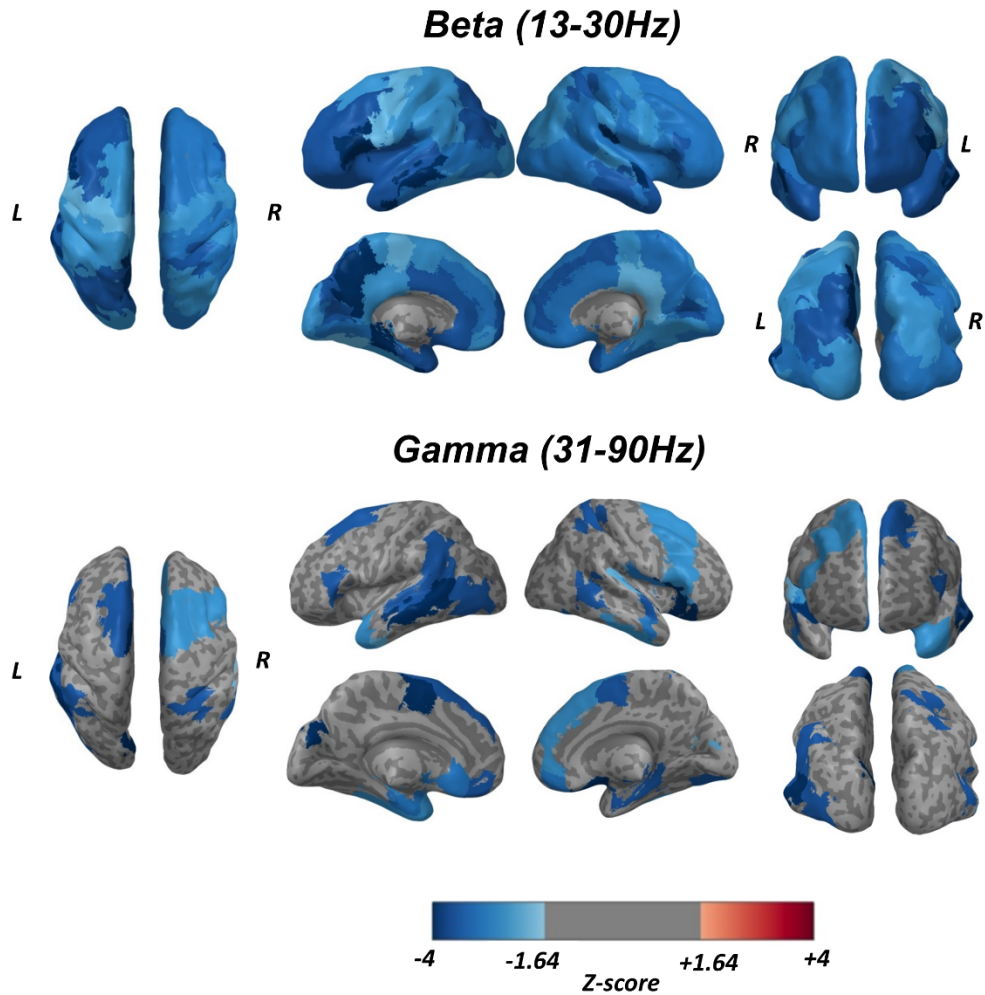

19

20 **Figure S3. Correlation between trial-by-trial predictions and MEEG activity in source space.** Colours  
 21 indicate the overall z-score for difference of empirical correlations from chance in the Beta (top  
 22 panel) and Gamma (bottom panel) frequency ranges. Empirical correlations were compared against  
 23 surrogate correlation distributions obtained by correlating predictions to phase randomized MEEG  
 24 signals (10000 randomization for each ROIs). Grey indicates non significant difference between  
 25 empirical and surrogate correlations at  $p < 0.05$  FDR corrected for multiple comparisons.  
 26

27

28

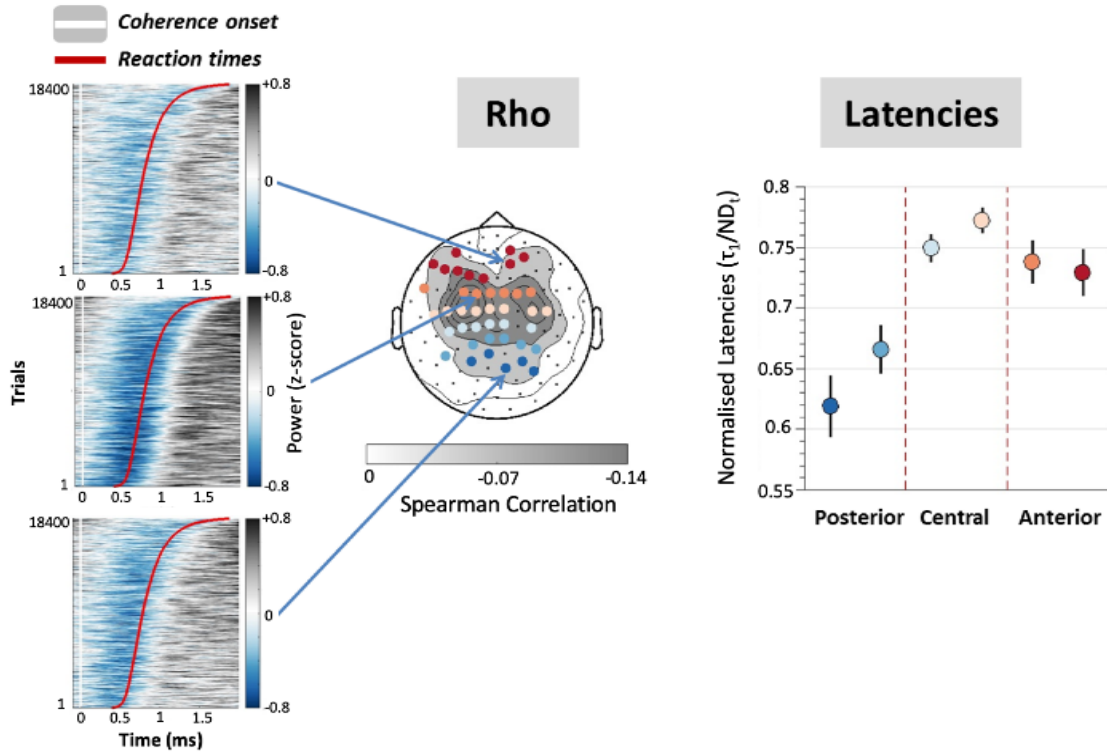

29

30 **Figure S4.** Temporal cascade of information-representation in beta (planar gradiometers in sensor  
31 space). Similarly to figure 4, the left panel shows power plots ranked by reaction times (red line).  
32 The topographic plot in the middle shows sensors where correlations between power-envelopes and  
33 model's predictions survived random permutation testing. Sensors are coloured depending on their  
34 position along the caudo-rostral axis. The right panel shows a gradient of latencies that increases  
35 from posterior areas up to central regions and decreases afterwards. No significant correlations were  
36 observed in the gamma band.

37

38

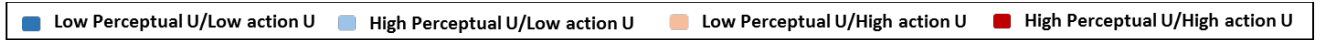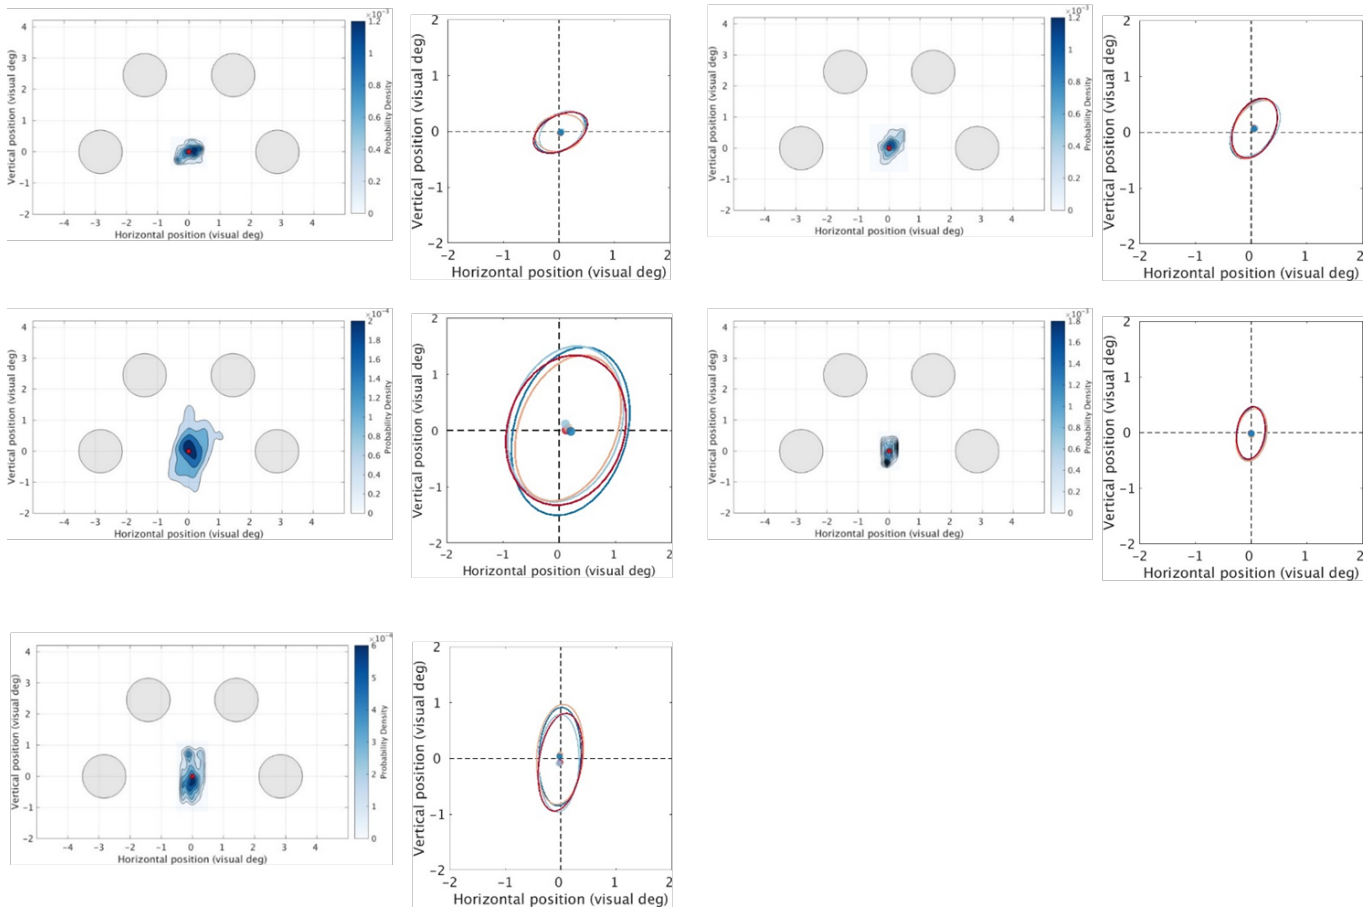

39

40

41

42 **Figure S5. Eye-tracking data from 5 participants** show that fixation could be easily maintained during  
 43 the scan session (heat-maps). In the plots on the right hand confidence ellipses encompassing 95% of  
 44 fixations population are shown for each condition. The colored points indicate the location of the  
 45 ellipses' centroids. The semimajor and semiminor axes and the orientation of the ellipses were  
 46 computed from the first and second principal components of the fixations scatter. The position of the  
 47 ellipses' centroid with respect to the fixation point (centre of cross-hair) gives a measure of fixation  
 48 accuracy, whereas its area provides an overall measure of fixation dispersion. Neither accuracy nor  
 49 dispersion of subjects' fixation differed between conditions (2 perceptual uncertainty x 2 action  
 50 uncertainty repeated-measures ANOVA. Accuracy: perception [ $F_{1,4}(0.379)$   $p = 0.57$ ] action [ $F_{1,4}(0.013)$   
 51  $p = 0.91$ ]; Dispersion: perception [ $F_{1,4}(0.078)$   $p = 0.79$ ] action [ $F_{1,4}(0.587)$   $p = 0.48$ ])

| Subj #         | Boundary ( <i>b</i> ) | Accumulation Rate ( <i>v</i> )                    |       |      |      | Accumulation Rate StDev | Non-decision time ( <i>t<sub>0</sub></i> ) |
|----------------|-----------------------|---------------------------------------------------|-------|------|------|-------------------------|--------------------------------------------|
|                |                       | <i>Uncertainty Levels (p:perceptual a:action)</i> |       |      |      |                         |                                            |
|                |                       | LpLa                                              | HpLa  | LpHa | HpHa |                         |                                            |
| 1              | 1.73                  | 7.96                                              | 5.42  | 4.48 | 2.06 | 4.63                    | 0.51                                       |
| 2              | 4.34                  | 18                                                | 11.7  | 5.6  | 3.47 | 5.59                    | 0.42                                       |
| 3              | 8.03                  | 18.33                                             | 15.54 | 7.08 | 6    | 5.62                    | 0.28                                       |
| 4              | 3.73                  | 14.26                                             | 11.46 | 4.65 | 2.47 | 6.53                    | 0.4                                        |
| 5              | 5.02                  | 13.99                                             | 9.49  | 4.52 | 3.27 | 6.21                    | 0.37                                       |
| 6              | 4.94                  | 9.98                                              | 5.86  | 6.36 | 5.42 | 4.36                    | 0.31                                       |
| 7              | 4.79                  | 8.77                                              | 6.94  | 3.65 | 3.1  | 4.66                    | 0.42                                       |
| 8              | 2.77                  | 5.46                                              | 4.02  | 2.91 | 2.18 | 3.12                    | 0.37                                       |
| 9              | 2.94                  | 5.86                                              | 4.72  | 3    | 2.59 | 4.56                    | 0.39                                       |
| 10             | 5.13                  | 11.55                                             | 9.64  | 6.7  | 5.01 | 4.76                    | 0.25                                       |
| 11             | 1.29                  | 4.16                                              | 3.5   | 2.15 | 1.22 | 3.28                    | 0.39                                       |
| 12             | 2.05                  | 5.68                                              | 3.94  | 2.41 | 1.54 | 3.98                    | 0.43                                       |
| 13             | 4.23                  | 10.59                                             | 8.13  | 4.8  | 3.36 | 4.25                    | 0.35                                       |
| 14             | 6.23                  | 6.65                                              | 5.63  | 5.88 | 5.23 | 6.72                    | 0.3                                        |
| 15             | 2.33                  | 6.54                                              | 5.28  | 2.74 | 1.53 | 4.62                    | 0.38                                       |
| 16             | 1.33                  | 5.98                                              | 4.41  | 1.39 | 1.3  | 3.01                    | 0.5                                        |
| 17             | 3.5                   | 14.66                                             | 11.74 | 3.79 | 2.27 | 5.65                    | 0.47                                       |
| 18             | 8.78                  | 17.52                                             | 14.99 | 8.65 | 8.13 | 4.96                    | 0.2                                        |
| <b>Mean</b>    | 4.06                  | 10.33                                             | 7.91  | 4.49 | 3.34 | 4.81                    | 0.37                                       |
| <b>Std Dev</b> | 2.13                  | 4.74                                              | 3.85  | 1.94 | 1.90 | 1.09                    | 0.08                                       |

52

53 **Table S1. Parameters for the winning LBA model**

| Acronym | Anatomical label                                                  |
|---------|-------------------------------------------------------------------|
| Opol    | <b>Occipital Pole</b>                                             |
| SCC     | <b>Supracalcarine Cortex</b>                                      |
| LING    | <b>Lingual Gyrus</b>                                              |
| OFG     | <b>Occipital Fusiform Gyrus</b>                                   |
| CUN     | <b>Cuneal Cortex</b>                                              |
| ICC     | <b>Intracalcarine Cortex</b>                                      |
| LOCinf  | <b>Lateral Occipital Cortex, inferior division</b>                |
| LOCsup  | <b>Lateral Occipital Cortex, superior division</b>                |
| pCUN    | <b>Precuneous Cortex</b>                                          |
| ITGto   | <b>Inferior Temporal Gyrus, temporo-occipital part</b>            |
| MTGto   | <b>Middle Temporal Gyrus, temporo-occipital part</b>              |
| TOFC    | <b>Temporal Occipital Fusiform Cortex</b>                         |
| AngG    | <b>Angular Gyrus</b>                                              |
| SMrgp   | <b>Supramarginal Gyrus, posterior division</b>                    |
| SPL     | <b>Superior Parietal Lobule</b>                                   |
| CGp     | <b>Cingulate Gyrus, posterior division</b>                        |
| PosCG   | <b>Postcentral Gyrus</b>                                          |
| ITGp    | <b>Inferior Temporal Gyrus, posterior division</b>                |
| PHGp    | Parahippocampal Gyrus, posterior division                         |
| TF Cp   | Temporal Fusiform Cortex, posterior division                      |
| SMrga   | Supramarginal Gyrus, anterior division                            |
| POpC    | Parietal Operculum Cortex                                         |
| MTGp    | Middle Temporal Gyrus, posterior division                         |
| PreCG   | Precentral Gyrus                                                  |
| HG      | Heschls Gyrus (includes H1 and H2)                                |
| STGp    | Superior Temporal Gyrus, posterior division                       |
| PTem    | Planum Temporale                                                  |
| MTGa    | Middle Temporal Gyrus, anterior division                          |
| STGa    | Superior Temporal Gyrus, anterior division                        |
| Ppol    | Planum Polare                                                     |
| COpC    | Central Opercular Cortex                                          |
| TFCa    | Temporal Fusiform Cortex, anterior division                       |
| CGa     | Cingulate Gyrus, anterior division                                |
| ITGa    | Inferior Temporal Gyrus, anterior division                        |
| PHGa    | Parahippocampal Gyrus, anterior division                          |
| SMA     | Juxtapositional Lobule Cortex (formerly Supplementary Motor Area) |
| TPO     | Temporal Pole                                                     |
| Ins     | Insular Cortex                                                    |
| IFGop   | Inferior Frontal Gyrus, pars opercularis                          |
| MFG     | Middle Frontal Gyrus                                              |
| SFG     | Superior Frontal Gyrus                                            |
| FOpC    | Frontal Operculum Cortex                                          |
| subCC   | Subcallosal Cortex                                                |
| FOC     | Frontal Orbital Cortex                                            |
| IFGtr   | Inferior Frontal Gyrus, pars triangularis                         |
| PCG     | Paracingulate Gyrus                                               |
| FMC     | Frontal Medial Cortex                                             |
| Fpol    | Frontal Pole                                                      |

54

55 **Table 2S. Abbreviations for the cortical regions in Figure 5c.** Regions in boldface formed the set of  
56 posterior regions (ROI centroids MNI coordinate  $Y \leq 42$ ;  $Y(42)$  = Postcentral Gyrus) defined with respect  
57 to the central sulcus. Thus defined posterior and anterior regions were used to calculate the posterior to  
58 anterior index (PAx) to quantify the posterior-to-anterior pattern of information flow.

59
